# Supplementary material for: Antioxidant Activity and Phenolic Compound Identification and Quantification in Western Australian Honeys
Source: MDPI journal article supplement (doi:10.3390/antiox12010189), 2023-01-12
Supplement: s1 [file s1]

# Supplementary Files of “Antioxidant Activity and Phenolic Compound Identification and Quantification in Western Australian Honey”.

**Supplementary Table S1:** Table S1 summarises the identity, botanical origin, and families of honeys collected as part of a study on Western Australia honeys

| Honey                    | Honey Type  | Floral Source                   | Family           | Code | n  |
|--------------------------|-------------|---------------------------------|------------------|------|----|
| Jarrah                   | Monofloral  | <i>Eucalyptus marginata</i>     | Myrtaceae        | JAR  | 58 |
| Marri                    | Monofloral  | <i>Corymbia calophylla</i>      | Myrtaceae        | MAR  | 38 |
| Manuka (Control)         | Monofloral  | <i>Leptospermum scoparium</i>   | Myrtaceae        | MAN  | 25 |
| Karri                    | Monofloral  | <i>Eucalyptus diversicolor</i>  | Myrtaceae        | KAR  | 24 |
| Peppermint               | Monofloral  | <i>Agonis flexuosa</i>          | Myrtaceae        | PEP  | 24 |
| <i>Leptospermum</i> spp. | Monofloral  | <i>Leptospermum</i> spp.        | Myrtaceae        | LEP  | 19 |
| Parrot Bush              | Monofloral  | <i>Banksia sessilis</i>         | Proteaceae       | BAS  | 16 |
| Blackbutt                | Monofloral  | <i>Eucalyptus patens</i>        | Myrtaceae        | BLA  | 15 |
| Powderbark               | Monofloral  | <i>Eucalyptus accedens</i>      | Myrtaceae        | POW  | 15 |
| Wandoo                   | Monofloral  | <i>Eucalyptus wandoo</i>        | Myrtaceae        | WAN  | 15 |
| Whitegum                 | Monofloral  | <i>Eucalyptus wandoo</i>        | Myrtaceae        | WHI  | 14 |
| Yate                     | Monofloral  | <i>Eucalyptus cornuta</i>       | Myrtaceae        | YAT  | 13 |
| Red Bell                 | Monofloral  | <i>Calothamnus</i> spp.         | Myrtaceae        | RED  | 12 |
| <i>Banksia menziesii</i> | Monofloral  | <i>Banksia menziesii</i>        | Proteaceae       | BAM  | 10 |
| Mallee                   | Monofloral  | <i>Eucalyptus</i> spp.          | Myrtaceae        | MAL  | 10 |
| Melaleuca                | Monofloral  | <i>Melaleuca</i> spp.           | Myrtaceae        | MEL  | 10 |
| Moort                    | Monofloral  | <i>Eucalyptus platypus</i>      | Myrtaceae        | MOO  | 10 |
| Blackbutt Coastal        | Monofloral  | <i>Eucalyptus</i> spp.          | Myrtaceae        | BLC  | 9  |
| <i>Eucalyptus</i> spp.   | Monofloral  | <i>Eucalyptus</i> spp.          | Myrtaceae        | EUC  | 9  |
| Multifloral              | Multifloral | N.I.                            | N.I.             | MUL  | 9  |
| Callistemon              | Monofloral  | <i>Callistemon</i> spp.         | Myrtaceae        | CAL  | 8  |
| Goldfields               | Multifloral | N.I.                            | N.I.             | GOL  | 8  |
| Wildflower               | Multifloral | N.I.                            | N.I.             | OH   | 6  |
| Banksia                  | Monofloral  | <i>Banksia</i> spp.             | Proteaceae       | OH   | 5  |
| Brown Mallet             | Monofloral  | <i>Eucalyptus astringens</i>    | Myrtaceae        | OH   | 5  |
| Bloodwood                | Monofloral  | <i>Corymbia zygophylla</i>      | Myrtaceae        | OH   | 4  |
| Spring                   | Multifloral | N.I.                            | N.I.             | OH   | 4  |
| Watermelon               | Monofloral  | <i>Citrullus lanatus</i>        | Cucurbitaceae    | OH   | 4  |
| Canola                   | Monofloral  | <i>Brassica napus</i>           | Brassicaceae     | OH   | 3  |
| Coastal                  | Multifloral | N.I.                            | N.I.             | OH   | 3  |
| Eremophila               | Monofloral  | <i>Eremophila</i> spp.          | Scrophulariaceae | OH   | 3  |
| Flooded Gum              | Monofloral  | <i>Eucalyptus rudis</i>         | Myrtaceae        | OH   | 3  |
| Grevillea                | Monofloral  | <i>Grevillea</i> spp.           | Proteaceae       | OH   | 3  |
| Merrit                   | Monofloral  | <i>Eucalyptus flocktoniae</i>   | Myrtaceae        | OH   | 3  |
| Tagasaste                | Monofloral  | <i>Cytisus proliferus</i>       | Fabaceae         | OH   | 3  |
| Tedera                   | Monofloral  | <i>Bituminaria bituminosa</i>   | Fabaceae         | OH   | 3  |
| Tuart                    | Monofloral  | <i>Eucalyptus gomphocephala</i> | Myrtaceae        | OH   | 3  |
| York Gum                 | Monofloral  | <i>Eucalyptus loxophleba</i>    | Myrtaceae        | OH   | 3  |

|                          |             |                              |              |    |    |
|--------------------------|-------------|------------------------------|--------------|----|----|
| Lophostemon              | Monofloral  | <i>Lophostemon confertus</i> | Myrtaceae    | OH | 2  |
| Scholtzia                | Monofloral  | <i>Scholtzia</i> spp.        | Myrtaceae    | OH | 2  |
| Acacia                   | Monofloral  | <i>Acacia</i> spp.           | Fabaceae     | OH | 1  |
| Almond                   | Monofloral  | <i>Prunus dulcis</i>         | Rosaceae     | OH | 1  |
| <i>Banksia grandis</i>   | Monofloral  | <i>Banksia grandis</i>       | Proteaceae   | OH | 1  |
| <i>Banksia prionotes</i> | Monofloral  | <i>Banksia prionotes</i>     | Proteaceae   | OH | 1  |
| <i>Banksia victoriae</i> | Monofloral  | <i>Banksia victoriae</i>     | Proteaceae   | OH | 1  |
| Blackbutt Goldfields     | Monofloral  | <i>Eucalyptus</i> spp.       | Myrtaceae    | OH | 1  |
| Bullich                  | Monofloral  | <i>Eucalyptus megacarpa</i>  | Myrtaceae    | OH | 1  |
| Capeweed                 | Monofloral  | <i>Arctotheca calendula</i>  | Asteraceae   | OH | 1  |
| Chamelaucium             | Monofloral  | <i>Chamelaucium</i> spp.     | Myrtaceae    | OH | 1  |
| Christmas Tree           | Monofloral  | <i>Nuytsia</i> spp.          | Loranthaceae | OH | 1  |
| Clivicola                | Monofloral  | <i>Eucalyptus clivicola</i>  | Myrtaceae    | OH | 1  |
| Field Pea                | Monofloral  | <i>Pisum sativum</i>         | Fabaceae     | OH | 1  |
| Gimlet                   | Monofloral  | <i>Eucalyptus salubris</i>   | Myrtaceae    | OH | 1  |
| Orange Blossum           | Monofloral  | <i>Citrus</i> spp.           | Rutaceae     | OH | 1  |
| Spotted Gum              | Monofloral  | <i>Corymbia maculata</i>     | Myrtaceae    | OH | 1  |
| Taxandria                | Monofloral  | <i>Taxandria</i> spp.        | Myrtaceae    | OH | 1  |
| Tingle                   | Monofloral  | <i>Eucalyptus jacksonii</i>  | Myrtaceae    | OH | 1  |
| Pasteur (Control)        | Multifloral | N.I.                         | N.I.         | OH | 1  |
| no data                  | N.I.        | N.I.                         | N.I.         | ND | 11 |

**Supplementary Table S2:** Honey Sample Collection and Floral Information, TPC, FRAP, and DPPH Antioxidant Activity

| Code    | Date Collected | Location     | Post Code | Floral Source              | TPC (GA)<br>eq.mg /100g | SD    | RSD (%) | FRAP (mmol Fe/kg) | SD   | RSD (%) | DPPH (mmol TE /kg at 2 hrs) | SD   | RSD (%) |
|---------|----------------|--------------|-----------|----------------------------|-------------------------|-------|---------|-------------------|------|---------|-----------------------------|------|---------|
| RED-86  | 01-Dec-17      | Cervantes    | 6511      | <i>Calothamnus</i> spp.    | 59.63                   | 0.440 | 0.738   | 9.75              | 0.21 | 2.11    | 3.67                        | 0.06 | 1.77    |
| RED-95  | 01-Dec-17      | Cervantes    | 6511      | <i>Calothamnus</i> spp.    | 61.47                   | 0.398 | 0.648   | 10.25             | 0.26 | 2.54    | 4.60                        | 0.09 | 2.01    |
| RED-101 | 01-Nov-17      | Cervantes    | 6511      | <i>Calothamnus</i> spp.    | 54.58                   | 0.830 | 1.520   | 7.79              | 0.19 | 2.39    | 3.07                        | 0.06 | 1.82    |
| RED-102 | 01-Nov-17      | Seabird      | 6042      | <i>Calothamnus</i> spp.    | 48.09                   | 0.593 | 1.232   | 6.76              | 0.19 | 2.74    | 2.45                        | 0.14 | 5.54    |
| RED-103 | 01-Dec-17      | Seabird      | 6042      | <i>Calothamnus</i> spp.    | 56.52                   | 0.136 | 0.240   | 9.36              | 0.15 | 1.60    | 3.93                        | 0.07 | 1.67    |
| RED-106 | 01-Nov-17      | Cervantes    | 6511      | <i>Calothamnus</i> spp.    | 53.65                   | 0.836 | 1.559   | 7.31              | 0.23 | 3.15    | 3.02                        | 0.11 | 3.59    |
| RED-134 | NI             | NI           | NI        | <i>Calothamnus</i> spp.    | 65.70                   | 0.959 | 1.459   | 11.02             | 0.14 | 1.26    | 4.85                        | 0.07 | 1.52    |
| RED-166 | NI             | NI           | NI        | <i>Calothamnus</i> spp.    | 75.56                   | 0.262 | 0.347   | 11.66             | 0.06 | 0.47    | 5.41                        | 0.09 | 1.67    |
| PEP-191 | 10-Jan-19      | Quedjinup    | 6281      | <i>Agonis flexuosa</i>     | 37.29                   | 0.917 | 2.458   | 4.41              | 0.05 | 1.19    | 1.98                        | 0.07 | 3.55    |
| PEP-240 | 01-Nov-17      | Yalgorup     | 6215      | <i>Agonis flexuosa</i>     | 33.94                   | 0.187 | 0.552   | 3.69              | 0.20 | 5.29    | 1.45                        | 0.08 | 5.40    |
| PEP-260 | NI             | Yallingup    | 6282      | <i>Agonis flexuosa</i>     | 42.71                   | 0.520 | 1.217   | 8.41              | 0.16 | 1.91    | 3.06                        | 0.05 | 1.60    |
| PEP-264 | NI             | NI           | NI        | <i>Agonis flexuosa</i>     | 36.40                   | 0.641 | 1.761   | 5.81              | 0.19 | 3.29    | 2.06                        | 0.14 | 7.03    |
| PEP-310 | 01-Jan-18      | Albany       | 6330      | <i>Agonis flexuosa</i>     | 30.05                   | 0.511 | 1.699   | 4.92              | 0.06 | 1.18    | 1.63                        | 0.12 | 7.38    |
| MAR-53. | 28-Mar-18      | Bindoon      | 6502      | <i>Corymbia calophylla</i> | 32.04                   | 0.363 | 1.132   | 4.61              | 0.02 | 0.46    | 1.50                        | 0.06 | 3.70    |
| MAR-54. | 28-Mar-18      | Bindoon      | 6502      | <i>Corymbia calophylla</i> | 30.52                   | 0.336 | 1.100   | 3.84              | 0.06 | 1.51    | 1.01                        | 0.08 | 8.31    |
| MAR-117 | 2018           | Mooliabeenie | 6504      | <i>Corymbia calophylla</i> | 33.62                   | 0.563 | 1.673   | 4.40              | 0.08 | 1.73    | 1.77                        | 0.07 | 3.69    |
| MAR-118 | 2018           | Mooliabeenie | 6504      | <i>Corymbia calophylla</i> | 34.19                   | 0.488 | 1.427   | 4.50              | 0.28 | 6.24    | 1.72                        | 0.11 | 6.59    |
| MAR-120 | NI             | NI           | NI        | <i>Corymbia calophylla</i> | 36.61                   | 0.027 | 0.075   | 4.51              | 0.16 | 3.50    | 1.64                        | 0.12 | 7.35    |
| MAR-121 | NI             | NI           | NI        | <i>Corymbia calophylla</i> | 32.15                   | 0.327 | 1.017   | 3.86              | 0.22 | 5.61    | 1.79                        | 0.06 | 3.31    |
| MAR-309 | 01-Mar-19      | Gingin       | 6503      | <i>Corymbia calophylla</i> | 31.55                   | 1.216 | 3.853   | 5.86              | 0.21 | 3.64    | 2.16                        | 0.16 | 7.62    |
| MAR-315 | 08-Feb-20      | Harvey       | 6220      | <i>Corymbia calophylla</i> | 20.05                   | 0.242 | 1.206   | 3.86              | 0.03 | 0.88    | 1.26                        | 0.05 | 4.08    |
| MAR-316 | 23-Feb-20      | Harvey       | 6220      | <i>Corymbia calophylla</i> | 18.91                   | 0.196 | 1.035   | 3.47              | 0.02 | 0.67    | 1.11                        | 0.08 | 7.08    |
| MAR-322 | NI             | Gidgegannup  | 6083      | <i>Corymbia calophylla</i> | 24.50                   | 0.209 | 0.851   | 4.41              | 0.05 | 1.14    | 2.16                        | 0.18 | 8.31    |
| MAR-323 | NI             | Allanson     | 6225      | <i>Corymbia calophylla</i> | 26.43                   | 0.324 | 1.225   | 4.43              | 0.08 | 1.76    | 1.77                        | 0.06 | 3.58    |
| MAR-325 | NI             | NI           | NI        | <i>Corymbia calophylla</i> | 33.73                   | 0.367 | 1.089   | 6.52              | 0.09 | 1.44    | 3.36                        | 0.06 | 1.69    |

|         |           |            |      |                             |       |       |       |      |      |      |      |      |      |
|---------|-----------|------------|------|-----------------------------|-------|-------|-------|------|------|------|------|------|------|
| MAR-329 | 17-Feb-20 | Yarloop    | 6218 | <i>Corymbia calophylla</i>  | 24.63 | 0.377 | 1.530 | 3.96 | 0.18 | 4.66 | 1.67 | 0.05 | 3.00 |
| JAR-09  | 01-Nov-15 | Yarloop    | 6218 | <i>Eucalyptus marginata</i> | 56.09 | 1.254 | 2.236 | 8.25 | 0.21 | 2.57 | 2.83 | 0.09 | 3.33 |
| JAR-50  | NI        | Dwellingup | 6213 | <i>Eucalyptus marginata</i> | 54.43 | 1.205 | 2.214 | 8.81 | 0.13 | 1.53 | 3.75 | 0.07 | 1.93 |
| JAR-68  | 06-Jan-17 | Jarrahdale | 6124 | <i>Eucalyptus marginata</i> | 47.88 | 0.175 | 0.366 | 6.30 | 0.11 | 1.74 | 1.79 | 0.07 | 4.13 |
| JAR-69  | 06-Jan-17 | Jarrahdale | 6124 | <i>Eucalyptus marginata</i> | 47.54 | 0.378 | 0.794 | 5.34 | 0.35 | 6.63 | 1.67 | 0.03 | 1.91 |
| JAR-75  | 08-Dec-16 | Jarrahdale | 6124 | <i>Eucalyptus marginata</i> | 51.31 | 0.584 | 1.139 | 7.11 | 0.18 | 2.49 | 1.98 | 0.11 | 5.79 |
| JAR-78  | NI        | NI         | NI   | <i>Eucalyptus marginata</i> | 46.24 | 0.278 | 0.602 | 5.20 | 0.19 | 3.72 | 1.82 | 0.10 | 5.23 |

**Supplementary Table S3:** Summary of the data used to determine the identity of the unknown bands in *Calothamnus* spp. (Red Bell) honey (Database 1A)

| Name and Code | Rf 1  | H° DEV 254 nm | H° DEV 366 nm | H° NP 366 nm | FI DEV $\lambda$ | FI DEV $\lambda$ m | UV DEV $\lambda_1$ | UV DEV $\lambda_2$ | UV DEV $\lambda_3$ | FI NP $\lambda$ | UV NP $\lambda_1$ |
|---------------|-------|---------------|---------------|--------------|------------------|--------------------|--------------------|--------------------|--------------------|-----------------|-------------------|
| RB            | 0.035 | 140.8         | 197.1         | 195.6        | 223              | 260                | 273                | 0                  | 0                  | 249             | 299               |
| RB            | 0.055 | 139.9         | 193.8         | 192.6        | 223              | 263                | 283                | 0                  | 0                  | 249             | 322               |
| RB            | 0.078 | 140.0         | 193.0         | 192.2        | 225              | 260                | 287                | 0                  | 0                  | 250             | 319               |
| RB            | 0.11  | 140.3         | 196.9         | 194.1        | 225              | 261                | 288                | 0                  | 0                  | 250             | 324               |
| RB            | 0.178 | 139.8         | 193.9         | 191.4        | 222              | 258                | 282                | 0                  | 0                  | 250             | 315               |
| RB            | 0.226 | 139.5         | 190.3         | 188.9        | 210              | 258                | 272                | 0                  | 0                  | 250             | 313               |
| RB            | 0.299 | 141           | 189.4         | 191.6        | 223              | 258                | 289                | 0                  | 0                  | 250             | 319               |
| RB            | 0.327 | 140.3         | 191.3         | 193.9        | 225              | 258                | 286                | 0                  | 0                  | 250             | 317               |
| RB            | 0.382 | 139.9         | 191.0         | 194.7        | 223              | 254                | 287                | 0                  | 0                  | 250             | 294               |
| RB            | 0.423 | 139.0         | 191.0         | 199.9        | 222              | 254                | 287                | 0                  | 0                  | 249             | 299               |
| RB            | 0.455 | 140.4         | 190.8         | 199.8        | 224              | 261                | 287                | 0                  | 0                  | 250             | 312               |
| RB            | 0.576 | 139.5         | 195.2         | 196.2        | 224              | 255                | 262                | 296                | 0                  | 245             | 328               |
| RB            | 0.609 | 139.3         | 202.0         | 200.2        | 225              | 255                | 261                | 292                | 0                  | 246             | 329               |

Legend: **Rf1** – retention factor in MPA, **H° DEV 254 nm** – hue equivalent at 254 nm prior to derivatisation, **H° DEV 366 nm** – hue equivalent at 366 nm prior to derivatisation, **H° NP 366 nm** – hue equivalent at 366 nm after derivatisation w/ NP-PEG derivatisation reagent, **FI DEV  $\lambda$** – fluorescence  $\lambda$  max prior to derivatisation, **FI DEV  $\lambda$  m** – fluorescence  $\lambda$  min prior to derivatisation, **UV DEV  $\lambda_{1-3}$**  – UV-Vis  $\lambda$  max prior to derivatisation, **FI NP  $\lambda$** – fluorescence  $\lambda$  max after derivatisation with NP-PEG reagent, **UV NP  $\lambda_{1-3}$** – UV-Vis  $\lambda$  max after derivatisation with NP-PEG reagent, Note: coloured cells represent colours as seen on HPTLC plate.

**Supplementary Table S4:** Summary of the data used to determine the identity of the unknown bands in *Calothamnus* spp. (Red Bell) honey (Database 1B)

| Name and Code | Rf 1  | H° DEV 254 nm | H° DEV 366 nm | H° VSA 366 nm | H° T VSA | Fl DEV $\lambda$ | Fl DEV $\lambda$ m | UV DEV $\lambda_1$ | UV DEV $\lambda_2$ | UV DEV $\lambda_3$ | Fl VS $\lambda$ | UV VS $\lambda$ |
|---------------|-------|---------------|---------------|---------------|----------|------------------|--------------------|--------------------|--------------------|--------------------|-----------------|-----------------|
| RB            | 0.035 | 139.7         | 196.3         | 205.2         | 24.6     | 223              | 260                | 272                | 0                  | 0                  | 248             | 377             |
| RB            | 0.055 | 140.0         | 192.3         | 205.1         | 25.3     | 223              | 263                | 287                | 0                  | 0                  | 254             | 454             |
| RB            | 0.078 | 140.3         | 193.3         | 203.4         | 26.0     | 223              | 260                | 286                | 0                  | 0                  | 254             | 454             |
| RB            | 0.11  | 139.7         | 198.3         | 210.5         | 18.1     | 223              | 261                | 289                | 0                  | 0                  | 246             | 458             |
| RB            | 0.178 | 139.8         | 193.1         | 205.1         | 21.6     | 222              | 258                | 283                | 0                  | 0                  | 249             | 450             |
| RB            | 0.226 | 139.5         | 191.1         | 202.2         | 28.2     | 222              | 258                | 276                | 0                  | 0                  | 248             | 447             |
| RB            | 0.299 | 139.7         | 189.4         | 202.2         | 25       | 225              | 258                | 288                | 0                  | 0                  | 249             | 472             |
| RB            | 0.327 | 139.7         | 190.2         | 209.2         | 14.5     | 223              | 258                | 287                | 0                  | 0                  | 249             | 472             |
| RB            | 0.382 | 140.0         | 191.0         | 206.2         | 21.5     | 225              | 254                | 287                | 0                  | 0                  | 249             | 472             |
| RB            | 0.423 | 139.1         | 190.2         | 208.5         | 22.7     | 223              | 254                | 287                | 0                  | 0                  | 248             | 461             |
| RB            | 0.455 | 140.4         | 190.5         | 210.8         | 26.1     | 223              | 261                | 287                | 0                  | 0                  | 249             | 464             |
| RB            | 0.576 | 139.1         | 195.2         | 212.7         | 2.4      | 225              | 255                | 261                | 295                | 0                  | 249             | 453             |
| RB            | 0.609 | 139.5         | 202.0         | 219.1         | 204.6    | 225              | 255                | 262                | 293                | 0                  | 249             | 461             |

Legend: **Rf1** – retention factor in MPA, **H° DEV 254 nm** – hue and colour equivalent at 254 nm prior to derivatisation, **H° DEV 366 nm** – hue and colour equivalent at 366 nm prior to derivatisation, **H° VS 366 nm** – hue and colour equivalent at 366 nm after derivatisation w/ VSA derivatisation reagent, **H° T VS** – hue and colour equivalent at transmittance in white light after derivatisation w/ VSA derivatisation reagent; **Fl DEV  $\lambda$  max**– fluorescence  $\lambda$  max prior to derivatisation, **Fl DEV  $\lambda$  m**– fluorescence  $\lambda$  min prior to derivatisation, **UV DEV  $\lambda_{1-3}$** – UV-Vis  $\lambda$  max prior to derivatisation, **Fl VS  $\lambda$** – fluorescence  $\lambda$  max after derivatisation with VSA reagent, **UV VS  $\lambda$** – UV-Vis  $\lambda$  max after derivatisation with VSA reagent, Note: coloured cells represent colours as seen on HPTLC plate.

**Supplementary Table S5:** Summary of the data used to determine the identity of the unknown bands in *Calothamnus* spp. (Red Bell) honey (Database 2A)

| Name and Code | Rf 2  | H° DEV 254 nm | H° DEV 366 nm | H° NP 366 nm | FI DEV $\lambda$ | FI DEV $\lambda$ m | UV DEV $\lambda_1$ | UV DEV $\lambda_2$ | UV DEV $\lambda_3$ | FI NP $\lambda$ | UV NP $\lambda_1$ |
|---------------|-------|---------------|---------------|--------------|------------------|--------------------|--------------------|--------------------|--------------------|-----------------|-------------------|
| RB            | 0.040 | 139.6         | 198.3         | 193.6        | 224              | 256                | 277                | 0                  | 0                  | 246             | 321               |
| RB            | 0.061 | 139.8         | 196.7         | 188.9        | 225              | 256                | 277                | 0                  | 0                  | 246             | 317               |
| RB            | 0.087 | 139.7         | 194.7         | 190.3        | 221              | 252                | 279                | 0                  | 0                  | 245             | 316               |
| RB            | 0.130 | 138.8         | 189.3         | 192.5        | 221              | 252                | 277                | 0                  | 0                  | 245             | 314               |
| RB            | 0.220 | 140.5         | 188.0         | 205.9        | 221              | 254                | 285                | 0                  | 0                  | 246             | 322               |
| RB            | 0.252 | 139.7         | 190.2         | 195.6        | 219              | 259                | 282                | 0                  | 0                  | 244             | 296               |
| RB            | 0.290 | 140.2         | 189.4         | 83.0         | 221              | 252                | 286                | 0                  | 0                  | 243             | 315               |
| RB            | 0.305 | 140.7         | 189.3         | 83.0         | 223              | 252                | 286                | 0                  | 0                  | 243             | 315               |
| RB            | 0.355 | 139.9         | 191.4         | 196.3        | 221              | 259                | 286                | 0                  | 0                  | 244             | 314               |
| RB            | 0.385 | 139.5         | 192.8         | 207.5        | 224              | 255                | 261                | 295                | 0                  | 246             | 327               |
| RB            | 0.404 | 137.9         | 192.2         | 197.3        | 225              | 256                | 262                | 295                | 0                  | 244             | 328               |
| RB            | 0.435 | 139.8         | 191.4         | 207.1        | 225              | 243                | 262                | 294                | 0                  | 244             | 328               |
| RB            | 0.489 | 139.6         | 196.5         | 197.5        | 227              | 253                | 261                | 295                | 0                  | 243             | 322               |
| RB            | 0.513 | 140.0         | 201.2         | 190.4        | 226              | 255                | 261                | 0                  | 0                  | 243             | 304               |
| RB            | 0.567 | 140.8         | 189.3         | 194.9        | 226              | 258                | 284                | 0                  | 0                  | 246             | 338               |

Legend: **Rf2** – retention factor in MPB, **H° DEV 254 nm** – hue equivalent at 254 nm prior to derivatisation, **H° DEV 366 nm** – hue equivalent at 366 nm prior to derivatisation, **H° NP 366 nm** – hue equivalent at 366 nm after derivatisation w/ NP-PEG derivatisation reagent, **FI DEV  $\lambda$** – fluorescence  $\lambda$  max prior to derivatisation, **FI DEV  $\lambda$  m** – fluorescence  $\lambda$  min prior to derivatisation, **UV DEV  $\lambda_{1-3}$** – UV-Vis  $\lambda$  max prior to derivatisation, **FI NP  $\lambda$** – fluorescence  $\lambda$  max after derivatisation with NP-PEG reagent, **UV NP  $\lambda_{1-3}$** – UV-Vis  $\lambda$  max after derivatisation with NP-PEG reagent, Note: coloured cells represent colours as seen on HPTLC plate.

**Supplementary Table S6:** Summary of the data used to determine the identity of the unknown bands in *Calothamnus* spp. (Red Bell) honey (Database 2B)

| Name and Code | Rf 2  | H° DEV 254 nm | H° DEV 366 nm | H° VSA 366 nm | H° T VSA | Fl DEV $\lambda$ | Fl DEV $\lambda$ m | UV DEV $\lambda_1$ | UV DEV $\lambda_2$ | UV DEV $\lambda_3$ | Fl VS $\lambda$ | UV VS $\lambda$ |
|---------------|-------|---------------|---------------|---------------|----------|------------------|--------------------|--------------------|--------------------|--------------------|-----------------|-----------------|
| RB            | 0.04  | 139.9         | 201.9         | 213.0         | 19.1     | 224              | 256                | 277                | 0                  | 0                  | 253             | 451             |
| RB            | 0.061 | 139.7         | 196.9         | 205.3         | 19.5     | 225              | 256                | 277                | 0                  | 0                  | 250             | 451             |
| RB            | 0.087 | 139.3         | 194.7         | 206.2         | 18.2     | 221              | 252                | 279                | 0                  | 0                  | 247             | 453             |
| RB            | 0.13  | 138.6         | 189.2         | 206.2         | 21.3     | 221              | 252                | 277                | 0                  | 0                  | 248             | 452             |
| RB            | 0.22  | 139.8         | 188.9         | 212.1         | 12.0     | 221              | 254                | 285                | 0                  | 0                  | 251             | 473             |
| RB            | 0.252 | 139.0         | 190.6         | 211.6         | 12.0     | 219              | 259                | 282                | 0                  | 0                  | 248             | 477             |
| RB            | 0.29  | 140.1         | 189.3         | 214.1         | 23.4     | 221              | 252                | 286                | 0                  | 0                  | 248             | 458             |
| RB            | 0.305 | 140.1         | 192.2         | 211.2         | 16.5     | 223              | 252                | 286                | 0                  | 0                  | 252             | 464             |
| RB            | 0.355 | 140.2         | 191.7         | 215.3         | 358.1    | 221              | 259                | 286                | 0                  | 0                  | 248             | 373             |
| RB            | 0.385 | 139.2         | 191.8         | 232.7         | 337.3    | 224              | 255                | 261                | 295                | 0                  | 252             | 499             |
| RB            | 0.404 | 138.6         | 192.2         | 244.7         | 280.0    | 225              | 256                | 262                | 295                | 0                  | 250             | 499             |
| RB            | 0.450 | 139.7         | 192.8         | 225.0         | 213.1    | 225              | 243                | 262                | 294                | 0                  | 252             | 498             |
| RB            | 0.5   | 139.8         | 199.3         | 210.5         | 2.3      | 227              | 253                | 267                | 0                  | 0                  | 248             | 353             |
| RB            | 0.513 | 139.7         | 199.4         | 209.1         | 7.3      | 226              | 255                | 261                | 0                  | 0                  | 250             | 481             |

Legend: **Rf2** – retention factor in MPB, **H° DEV 254 nm** – hue and colour equivalent at 254 nm prior to derivatisation, **H° DEV 366 nm** – hue and colour equivalent at 366 nm prior to derivatisation, **H° VSA 366 nm** – hue and colour equivalent at 366 nm after derivatisation w/ VSA derivatisation reagent, **H° T VSA** – hue and colour equivalent at transmittance in white light after derivatisation w/ VSA derivatisation reagent; **Fl DEV  $\lambda$  max**– fluorescence  $\lambda$  max prior to derivatisation, **Fl DEV  $\lambda$  m**– fluorescence  $\lambda$  min prior to derivatisation, **UV DEV  $\lambda_{1-3}$**  – UV-Vis  $\lambda$  max prior to derivatisation, **Fl VS  $\lambda$** – fluorescence  $\lambda$  max after derivatisation with VSA reagent, **UV VS  $\lambda$** – UV-Vis  $\lambda$  max after derivatisation with VSA reagent, Note: coloured cells represent colours as seen on HPTLC plate.



**Supplementary Table S7:** Summary of the data used to determine the identity of the unknown bands in *Agonis flexuosa* (Coastal Peppermint) honey (Database 1A)

| Name and Code | Rf 1  | H° DEV 254 nm | H° DEV 366 nm | H° NP 366 nm | FI DEV $\lambda$ | FI DEV $\lambda$ m | UV DEV $\lambda_1$ | UV DEV $\lambda_2$ | UV DEV $\lambda_3$ | FI NP $\lambda$ | UV NP $\lambda_1$ | UV NP $\lambda_2$ |
|---------------|-------|---------------|---------------|--------------|------------------|--------------------|--------------------|--------------------|--------------------|-----------------|-------------------|-------------------|
| CP            | 0.008 | 127.5         | 194.1         | 187.3        | 223              | 251                | 288                | 0                  | 0                  | 242             | 298               | 385               |
| CP            | 0.019 | 139.5         | 198.1         | 191.4        | 223              | 252                | 287                | 0                  | 0                  | 243             | 298               | 385               |
| CP            | 0.038 | 139.7         | 199.3         | 192.0        | 223              | 253                | 291                | 0                  | 0                  | 249             | 300               | 400               |
| CP            | 0.075 | 138.4         | 200.0         | 192.0        | 223              | 251                | 287                | 0                  | 0                  | 249             | 296               | 395               |
| CP            | 0.134 | 138.9         | 166.4         | 188.2        | 224              | 251                | 280                | 0                  | 0                  | 249             | 312               | 401               |
| CP            | 0.195 | 138.8         | 196.5         | 194.9        | 223              | 241                | 317                | 0                  | 0                  | 249             | 319               | 398               |
| CP            | 0.241 | 138.9         | 189.6         | 192.1        | 224              | 251                | 296                | 0                  | 0                  | 249             | 315               | 400               |
| CP            | 0.261 | 138.9         | 191.9         | 192.2        | 224              | 251                | 287                | 0                  | 0                  | 251             | 315               | 400               |
| CP            | 0.314 | 139.1         | 192.1         | 192.2        | 225              | 251                | 286                | 0                  | 0                  | 249             | 313               | 400               |
| CP            | 0.351 | 138.2         | 190.6         | 191.0        | 224              | 248                | 287                | 0                  | 0                  | 249             | 296               | 398               |
| CP            | 0.388 | 138.0         | 192.9         | 192.9        | 221              | 250                | 286                | 0                  | 0                  | 248             | 296               | 402               |
| CP            | 0.471 | 149.6         | 190.1         | 195.3        | 224              | 252                | 262                | 357                | 0                  | 243             | 298               | 393               |
| CP            | 0.499 | 140.3         | 191.3         | 194.7        | 221              | 248                | 287                | 0                  | 0                  | 244             | 298               | 393               |
| CP            | 0.545 | 139.1         | 191.3         | 82.4         | 224              | 249                | 268                | 352                | 0                  | 244             | 296               | 398               |
| CP            | 0.563 | 138.0         | 191.3         | 82.4         | 223              | 248                | 268                | 352                | 0                  | 244             | 298               | 398               |
| CP            | 0.588 | 137.8         | 191.3         | 82.4         | 224              | 251                | 260                | 0                  | 0                  | 243             | 291               | 468               |
| CP            | 0.615 | 137.7         | 201.2         | 190.6        | 225              | 253                | 272                | 0                  | 0                  | 244             | 291               | 398               |
| CP            | 0.690 | 139.4         | 191.7         | 190.4        | 225              | 253                | 285                | 0                  | 0                  | 249             | 295               | 398               |

Legend: **Rf1** – retention factor in MPA, **H° DEV 254 nm** – hue equivalent at 254 nm prior to derivatisation, **H° DEV 366 nm** – hue equivalent at 366 nm prior to derivatisation, **H° NP 366 nm** – hue equivalent at 366 nm after derivatisation w/ NP-PEG derivatisation reagent, **FI DEV  $\lambda$** – fluorescence  $\lambda$  max prior to derivatisation, **FI DEV  $\lambda$  m** – fluorescence  $\lambda$  min prior to derivatisation, **UV DEV  $\lambda_{1-3}$**  – UV-Vis  $\lambda$  max prior to derivatisation, **FI NP  $\lambda$** – fluorescence  $\lambda$  max after derivatisation with NP-PEG reagent, **UV NP  $\lambda_{1-3}$** – UV-Vis  $\lambda$  max after derivatisation with NP-PEG reagent, Note: coloured cells represent colours as seen on HPTLC plate.

**Supplementary Table S8:** Summary of the data used to determine the identity of the unknown bands in *Agonis flexuosa* (Coastal Peppermint) honey (Database 1B)

| Name and Code | Rf 2  | H° DEV 254 nm | H° DEV 366 nm | H° VSA 366 nm | H° T VSA | Fl DEV $\lambda$ | Fl DEV $\lambda$ m | UV DEV $\lambda_1$ | UV DEV $\lambda_2$ | UV DEV $\lambda_3$ | Fl VS $\lambda$ | UV VS $\lambda$ |
|---------------|-------|---------------|---------------|---------------|----------|------------------|--------------------|--------------------|--------------------|--------------------|-----------------|-----------------|
| CP            | 0.035 | 139.7         | 196.3         | 205.2         | 24.6     | 223              | 258                | 272                | 0                  | 0                  | 248             | 377             |
| CP            | 0.055 | 140.0         | 192.3         | 205.1         | 25.3     | 223              | 261                | 287                | 0                  | 0                  | 254             | 454             |
| CP            | 0.078 | 140.3         | 193.3         | 203.4         | 26.0     | 223              | 261                | 286                | 0                  | 0                  | 254             | 454             |
| CP            | 0.110 | 139.7         | 198.3         | 210.5         | 18.1     | 223              | 262                | 289                | 0                  | 0                  | 246             | 458             |
| CP            | 0.178 | 139.8         | 193.1         | 205.1         | 21.6     | 222              | 260                | 283                | 0                  | 0                  | 249             | 450             |
| CP            | 0.226 | 139.5         | 191.1         | 202.2         | 28.2     | 222              | 258                | 276                | 0                  | 0                  | 248             | 447             |
| CP            | 0.299 | 139.7         | 189.4         | 248.0         | 25.0     | 225              | 260                | 288                | 0                  | 0                  | 249             | 472             |
| CP            | 0.327 | 139.7         | 190.2         | 209.2         | 14.5     | 223              | 258                | 287                | 0                  | 0                  | 249             | 472             |
| CP            | 0.382 | 140.0         | 191.0         | 206.2         | 21.5     | 225              | 261                | 287                | 0                  | 0                  | 249             | 472             |
| CP            | 0.423 | 139.1         | 190.2         | 208.5         | 22.7     | 223              | 253                | 282                | 0                  | 0                  | 248             | 461             |
| CP            | 0.455 | 140.4         | 190.5         | 210.8         | 26.1     | 223              | 260                | 287                | 0                  | 0                  | 249             | 464             |
| CP            | 0.576 | 139.1         | 195.2         | 212.7         | 2.4      | 225              | 255                | 261                | 295                | 0                  | 249             | 453             |
| CP            | 0.609 | 139.5         | 202.0         | 219.1         | 204.6    | 225              | 256                | 262                | 293                | 0                  | 249             | 461             |

Legend: **Rf1** – retention factor in MPB, **H° DEV 254 nm** – hue and colour equivalent at 254 nm prior to derivatisation, **H° DEV 366 nm** – hue and colour equivalent at 366 nm prior to derivatisation, **H° VSA 366 nm** – hue and colour equivalent at 366 nm after derivatisation w/ VSA derivatisation reagent, **H° T VSA** – hue and colour equivalent at transmittance in white light after derivatisation w/ VSA derivatisation reagent; **Fl DEV  $\lambda$  max**– fluorescence  $\lambda$  max prior to derivatisation, **Fl DEV  $\lambda$  m**– fluorescence  $\lambda$  min prior to derivatisation, **UV DEV  $\lambda_{1-3}$** – UV-Vis  $\lambda$  max prior to derivatisation, **Fl VS  $\lambda$** – fluorescence  $\lambda$  max after derivatisation with VSA reagent, **UV VS  $\lambda$** – UV-Vis  $\lambda$  max after derivatisation with VSA reagent, Note: coloured cells represent colours as seen on HPTLC plate.

**Supplementary Table S9:** Summary of the data used to determine the identity of the unknown bands in *Agonis flexuosa* (Coastal Peppermint) honey (Database 2A)

| Name and Code | Rf 1  | H° DEV 254 nm | H° DEV 366 nm | H° NP 366 nm | FI DEV $\lambda$ | FI DEV $\lambda$ m | UV DEV $\lambda_1$ | UV DEV $\lambda_2$ | UV DEV $\lambda_3$ | FI NP $\lambda$ | UV NP $\lambda_1$ | UV NP $\lambda_2$ |
|---------------|-------|---------------|---------------|--------------|------------------|--------------------|--------------------|--------------------|--------------------|-----------------|-------------------|-------------------|
| CP            | 0.020 | 142.0         | 201.0         | 180.3        | 223              | 251                | 292                | 0                  | 0                  | 240             | 268               | 0                 |
| CP            | 0.055 | 142.0         | 198.0         | 194.0        | 221              | 242                | 317                | 0                  | 0                  | 233             | 291               | 0                 |
| CP            | 0.090 | 141.0         | 196.0         | 193.9        | 220              | 255                | 293                | 0                  | 0                  | 236             | 269               | 291               |
| CP            | 0.105 | 141.0         | 193.0         | 192.6        | 220              | 255                | 292                | 0                  | 0                  | 239             | 269               | 291               |
| CP            | 0.135 | 141.0         | 193.0         | 193.8        | 218              | 246                | 286                | 0                  | 0                  | 237             | 269               | 291               |
| CP            | 0.180 | 140.0         | 194.0         | 194.9        | 223              | 250                | 286                | 0                  | 0                  | 236             | 269               | 291               |
| CP            | 0.235 | 140.0         | 194.0         | 194.7        | 222              | 255                | 286                | 0                  | 0                  | 237             | 269               | 291               |
| CP            | 0.265 | 149.0         | 193.0         | 194.3        | 223              | 254                | 263                | 356                | 0                  | 238             | 269               | 291               |
| CP            | 0.285 | 147.0         | 194.0         | 193.1        | 223              | 255                | 263                | 356                | 0                  | 239             | 269               | 291               |
| CP            | 0.325 | 139.0         | 194.0         | 186.4        | 222              | 247                | 287                | 0                  | 0                  | 236             | 269               | 291               |
| CP            | 0.355 | 139.0         | 198.0         | 145.0        | 222              | 247                | 283                | 0                  | 0                  | 236             | 269               | 291               |
| CP            | 0.375 | 141.0         | 196.0         | 102.1        | 222              | 248                | 266                | 350                | 0                  | 242             | 269               | 291               |
| CP            | 0.405 | 140.0         | 194.0         | 152.5        | 225              | 252                | 266                | 350                | 0                  | 240             | 269               | 291               |
| CP            | 0.415 | 140.0         | 192.0         | 185.3        | 222              | 252                | 280                | 0                  | 0                  | 239             | 269               | 291               |
| CP            | 0.450 | 140.0         | 197.0         | 193.1        | 223              | 235                | 280                | 0                  | 0                  | 242             | 269               | 291               |
| CP            | 0.475 | 140.0         | 200.0         | 193.0        | 227              | 258                | 270                | 0                  | 0                  | 242             | 269               | 291               |
| CP            | 0.550 | 140.0         | 192.0         | 196.0        | 226              | 257                | 285                | 0                  | 0                  | 242             | 269               | 291               |
| CP            | 0.600 | 140.0         | 188.0         | 194.6        | 228              | 266                | 294                | 0                  | 0                  | 248             | 269               | 291               |

Legend: **Rf2** – retention factor in MPA, **H° DEV 254 nm** – hue equivalent at 254 nm prior to derivatisation, **H° DEV 366 nm** – hue equivalent at 366 nm prior to derivatisation, **H° NP 366 nm** – hue equivalent at 366 nm after derivatisation w/ NP-PEG derivatisation reagent, **FI DEV  $\lambda$** – fluorescence  $\lambda$  max prior to derivatisation, **FI DEV  $\lambda$  m** – fluorescence  $\lambda$  min prior to derivatisation, **UV DEV  $\lambda_{1-3}$**  – UV-Vis  $\lambda$  max prior to derivatisation, **FI NP  $\lambda$** – fluorescence  $\lambda$  max after derivatisation with NP-PEG reagent, **UV NP  $\lambda_{1-3}$** – UV-Vis  $\lambda$  max after derivatisation with NP-PEG reagent, Note: coloured cells represent colours as seen on HPTLC plate.

**Supplementary Table S10:** Summary of the data used to determine the identity of the unknown bands in *Agonis flexuosa* (Coastal Peppermint) honey (Database 2B)

| Name and Code | Rf 2  | H° DEV 254 nm | H° DEV 366 nm | H° VSA 366 nm | H° T VSA | Fl DEV $\lambda$ | Fl DEV $\lambda$ m | UV DEV $\lambda_1$ | UV DEV $\lambda_2$ | UV DEV $\lambda_3$ | Fl VS $\lambda$ | UV VS $\lambda$ |
|---------------|-------|---------------|---------------|---------------|----------|------------------|--------------------|--------------------|--------------------|--------------------|-----------------|-----------------|
| CP            | 0.030 | 141.6         | 201.0         | 207.5         | 11.7     | 223              | 251                | 316                | 0                  | 0                  | 261             | 386             |
| CP            | 0.050 | 141.2         | 195.5         | 203.8         | 10.6     | 223              | 242                | 316                | 0                  | 0                  | 258             | 386             |
| CP            | 0.060 | 141.6         | 191.3         | 200.6         | 12.6     | 221              | 242                | 317                | 0                  | 0                  | 251             | 386             |
| CP            | 0.075 | 141.1         | 188.9         | 203.2         | 12.7     | 222              | 242                | 280                | 0                  | 0                  | 258             | 386             |
| CP            | 0.105 | 141.3         | 190.9         | 202.5         | 7.6      | 220              | 255                | 289                | 0                  | 0                  | 252             | 386             |
| CP            | 0.130 | 140.5         | 194.1         | 203.2         | 7.6      | 218              | 246                | 289                | 0                  | 0                  | 251             | 386             |
| CP            | 0.150 | 140.5         | 187.4         | 206.1         | 11.9     | 218              | 244                | 288                | 0                  | 0                  | 248             | 386             |
| CP            | 0.190 | 139.9         | 192.0         | 211.6         | 327.0    | 223              | 250                | 287                | 0                  | 0                  | 251             | 386             |
| CP            | 0.245 | 140.2         | 190.3         | 207.7         | 358.1    | 222              | 255                | 280                | 0                  | 0                  | 248             | 388             |
| CP            | 0.275 | 147.5         | 192.3         | 190.3         | 21.6     | 223              | 254                | 262                | 357                | 0                  | 275             | 388             |
| CP            | 0.290 | 147.0         | 192.1         | 192.1         | 35.2     | 223              | 255                | 264                | 356                | 0                  | 252             | 388             |
| CP            | 0.340 | 138.6         | 192.8         | 241.6         | 240.0    | 222              | 247                | 288                | 0                  | 0                  | 259             | 388             |
| CP            | 0.370 | 138.6         | 197.5         | 218.8         | 336.9    | 222              | 248                | 258                | 349                | 0                  | 258             | 386             |
| CP            | 0.390 | 140.7         | 195.9         | 202.2         | 2.0      | 222              | 248                | 258                | 349                | 0                  | 251             | 384             |
| CP            | 0.420 | 140.6         | 193.0         | 219.6         | 3.1      | 225              | 252                | 280                | 0                  | 0                  | 250             | 385             |
| CP            | 0.430 | 140.1         | 192.6         | 272.7         | 2.4      | 222              | 252                | 280                | 0                  | 0                  | 248             | 387             |
| CP            | 0.455 | 140.3         | 197.5         | 334.0         | 2.0      | 223              | 235                | 279                | 0                  | 0                  | 248             | 450             |
| CP            | 0.485 | 140.0         | 196.6         | 204.8         | 13.3     | 227              | 258                | 266                | 0                  | 0                  | 248             | 387             |
| CP            | 0.560 | 140.0         | 190.9         | 201.5         | 8.9      | 226              | 257                | 285                | 0                  | 0                  | 248             | 387             |
| CP            | 0.600 | 140.3         | 189.4         | 201.2         | 346.7    | 225              | 266                | 292                | 0                  | 0                  | 249             | 387             |

Legend: **Rf2** – retention factor in MPB, **H° DEV 254 nm** – hue and colour equivalent at 254 nm prior to derivatisation, **H° DEV 366 nm** – hue and colour equivalent at 366 nm prior to derivatisation, **H° VSA 366 nm** – hue and colour equivalent at 366 nm after derivatisation w/ VSA derivatisation reagent, **H° T VSA** – hue and colour equivalent at transmittance in white light after derivatisation w/ VSA derivatisation reagent; **Fl DEV  $\lambda$  max**– fluorescence  $\lambda$  max prior to derivatisation, **Fl DEV  $\lambda$  m**– fluorescence  $\lambda$  min prior to derivatisation, **UV DEV  $\lambda_{1-3}$** – UV-Vis  $\lambda$  max prior to derivatisation, **Fl VS  $\lambda$** – fluorescence  $\lambda$  max after derivatisation with VSA reagent, **UV VS  $\lambda$** – UV-Vis  $\lambda$  max after derivatisation with VSA reagent, Note: coloured cells represent colours as seen on HPTLC plate.

**Supplementary Table S11:** Summary of the data used to determine the identity of the unknown bands in *Corymbia calophylla* (Marri) honey (Database 1A)

| Name and Code | Rf 1  | H° DEV 254 nm | H° DEV 366 nm | H° NP 366 nm | FI DEV $\lambda$ | FI DEV $\lambda$ m | UV DEV $\lambda_1$ | UV DEV $\lambda_2$ | UV DEV $\lambda_3$ | FI NP $\lambda$ | UV NP $\lambda_1$ | UV NP $\lambda_2$ |
|---------------|-------|---------------|---------------|--------------|------------------|--------------------|--------------------|--------------------|--------------------|-----------------|-------------------|-------------------|
| Marri         | 0.012 | 141.5         | 199.4         | 180.0        | 223              | 258                | 292                | 0                  | 0                  | 249             | 299               | 0                 |
| Marri         | 0.025 | 140.7         | 200.0         | 193.9        | 223              | 258                | 290                | 0                  | 0                  | 250             | 299               | 0                 |
| Marri         | 0.052 | 139.7         | 194.0         | 191.5        | 223              | 258                | 287                | 0                  | 0                  | 248             | 299               | 0                 |
| Marri         | 0.105 | 139.7         | 194.2         | 189.4        | 223              | 253                | 255                | 291                | 0                  | 250             | 299               | 0                 |
| Marri         | 0.115 | 140.0         | 193.2         | 187.8        | 223              | 252                | 255                | 291                | 0                  | 250             | 299               | 0                 |
| Marri         | 0.156 | 139.6         | 193.0         | 186.4        | 223              | 255                | 258                | 291                | 0                  | 250             | 317               | 0                 |
| Marri         | 0.186 | 140.2         | 194.0         | 186.0        | 223              | 258                | 287                | 0                  | 0                  | 250             | 314               | 0                 |
| Marri         | 0.216 | 140.5         | 195.5         | 177.2        | 222              | 258                | 287                | 0                  | 0                  | 250             | 313               | 0                 |
| Marri         | 0.259 | 140.7         | 197.8         | 184.6        | 223              | 255                | 288                | 361                | 0                  | 250             | 310               | 0                 |
| Marri         | 0.294 | 140.1         | 193.9         | 186.2        | 223              | 258                | 288                | 0                  | 0                  | 250             | 299               | 0                 |
| Marri         | 0.375 | 140.1         | 190.5         | 191.9        | 222              | 250                | 287                | 0                  | 0                  | 249             | 294               | 0                 |
| Marri         | 0.455 | 140.1         | 191.1         | 185.8        | 223              | 252                | 286                | 0                  | 0                  | 246             | 301               | 0                 |
| Marri         | 0.475 | 139.3         | 192.5         | 165.4        | 223              | 252                | 286                | 0                  | 0                  | 247             | 304               | 0                 |
| Marri         | 0.499 | 139.2         | 195.1         | 102.5        | 223              | 250                | 287                | 0                  | 0                  | 247             | 299               | 0                 |
| Marri         | 0.546 | 133.9         | 190.4         | 53.6         | 222              | 249                | 291                | 0                  | 0                  | 236             | 294               | 0                 |
| Marri         | 0.609 | 139.3         | 194.2         | 110.2        | 222              | 249                | 291                | 0                  | 0                  | 236             | 294               | 0                 |
| Marri         | 0.619 | 139.3         | 194.0         | 144.0        | 225              | 254                | 258                | 0                  | 0                  | 245             | 294               | 0                 |
| Marri         | 0.697 | 140.2         | 186.2         | 190.4        | 225              | 254                | 288                | 0                  | 0                  | 245             | 335               | 0                 |

Legend: **Rf1** – retention factor in MPA, **H° DEV 254 nm** – hue equivalent at 254 nm prior to derivatisation, **H° DEV 366 nm** – hue equivalent at 366 nm prior to derivatisation, **H° NP 366 nm** – hue equivalent at 366 nm after derivatisation w/ NP-PEG derivatisation reagent, **FI DEV  $\lambda$** – fluorescence  $\lambda$  max prior to derivatisation, **FI DEV  $\lambda$  m** – fluorescence  $\lambda$  min prior to derivatisation, **UV DEV  $\lambda_{1-3}$**  – UV-Vis  $\lambda$  max prior to derivatisation, **FI NP  $\lambda$** – fluorescence  $\lambda$  max after derivatisation with NP-PEG reagent, **UV NP  $\lambda_{1-3}$** – UV-Vis  $\lambda$  max after derivatisation with NP-PEG reagent

**Supplementary Table S12:** Summary of the data used to determine the identity of the unknown bands in *Corymbia calophylla* (Marri) honey (Database 1B)

| Name and Code | Rf 1  | H° DEV 254 nm | H° DEV 366 nm | H° VSA 366 nm | H° T VSA | Fl DEV $\lambda$ | Fl DEV $\lambda$ m | UV DEV $\lambda_1$ | UV DEV $\lambda_2$ | UV DEV $\lambda_3$ | Fl VS $\lambda$ | UV VS $\lambda$ |
|---------------|-------|---------------|---------------|---------------|----------|------------------|--------------------|--------------------|--------------------|--------------------|-----------------|-----------------|
| Marri         | 0.055 | 139.7         | 197.0         | 204.0         | 12.4     | 220              | 255                | 289                | 0                  | 0                  | 258             | 385             |
| Marri         | 0.080 | 140.3         | 196.0         | 201.0         | 13.9     | 209              | 257                | 289                | 0                  | 0                  | 250             | 384             |
| Marri         | 0.095 | 140.3         | 196.0         | 202.0         | 13.9     | 213              | 257                | 289                | 0                  | 0                  | 248             | 385             |
| Marri         | 0.115 | 139.5         | 193.0         | 202.0         | 11.5     | 213              | 257                | 289                | 0                  | 0                  | 245             | 387             |
| Marri         | 0.135 | 139.9         | 195.0         | 201.0         | 12.5     | 213              | 247                | 289                | 0                  | 0                  | 248             | 386             |
| Marri         | 0.145 | 139.3         | 194.0         | 201.0         | 14.6     | 213              | 247                | 288                | 0                  | 0                  | 248             | 388             |
| Marri         | 0.165 | 139.9         | 191.0         | 204.0         | 8.9      | 213              | 254                | 288                | 0                  | 0                  | 247             | 386             |
| Marri         | 0.195 | 140.0         | 188.0         | 211.0         | 7.8      | 213              | 252                | 288                | 0                  | 0                  | 254             | 385             |
| Marri         | 0.245 | 139.1         | 182.0         | 208.0         | 16.1     | 214              | 252                | 256                | 0                  | 0                  | 250             | 386             |
| Marri         | 0.285 | 140.3         | 192.0         | 209.0         | 5.3      | 222              | 262                | 285                | 0                  | 0                  | 248             | 385             |
| Marri         | 0.300 | 140.1         | 198.0         | 207.0         | 1.7      | 222              | 262                | 286                | 0                  | 0                  | 248             | 386             |
| Marri         | 0.370 | 135.0         | 189.0         | 238.0         | 358.0    | 222              | 248                | 262                | 340                | 0                  | 261             | 495             |
| Marri         | 0.395 | 139.2         | 191.0         | 212.0         | 344.0    | 222              | 248                | 262                | 340                | 0                  | 258             | 505             |
| Marri         | 0.430 | 137.9         | 190.0         | 211.0         | 1.4      | 222              | 248                | 289                | 0                  | 0                  | 258             | 385             |
| Marri         | 0.475 | 139.0         | 192.0         | 204.0         | 2.4      | 226              | 253                | 257                | 0                  | 0                  | 256             | 387             |

Legend: **Rf1** – retention factor in MPB, **H° DEV 254 nm** – hue and colour equivalent at 254 nm prior to derivatisation, **H° DEV 366 nm** – hue and colour equivalent at 366 nm prior to derivatisation, **H° VSA 366 nm** – hue and colour equivalent at 366 nm after derivatisation w/ VSA derivatisation reagent, **H° T VSA** – hue and colour equivalent at transmittance in white light after derivatisation w/ VSA derivatisation reagent; **Fl DEV  $\lambda$  max**– fluorescence  $\lambda$  max prior to derivatisation, **Fl DEV  $\lambda$  m**– fluorescence  $\lambda$  min prior to derivatisation, **UV DEV  $\lambda_{1-3}$** – UV-Vis  $\lambda$  max prior to derivatisation, **Fl VS  $\lambda$** – fluorescence  $\lambda$  max after derivatisation with VSA reagent, **UV VS  $\lambda$** – UV-Vis  $\lambda$  max after derivatisation with VSA reagent

**Supplementary Table S13:** Summary of the data used to determine the identity of the unknown bands in *Corymbia calophylla* (Marri) honey (Database 2A)

| Name and Code | Rf 2  | H° DEV 254 nm | H° DEV 366 nm | H° NP 366 nm | Fl DEV $\lambda$ | Fl DEV $\lambda$ m | UV DEV $\lambda_1$ | UV DEV $\lambda_2$ | UV DEV $\lambda_3$ | Fl NP $\lambda$ | UV NP $\lambda_1$ | UV NP $\lambda_2$ |
|---------------|-------|---------------|---------------|--------------|------------------|--------------------|--------------------|--------------------|--------------------|-----------------|-------------------|-------------------|
| Marri         | 0.050 | 140.0         | 197.5         | 176.9        | 220              | 255                | 293                | 0                  | 0                  | 237             | 293               | 0                 |
| Marri         | 0.080 | 140.7         | 199.5         | 183.7        | 209              | 257                | 293                | 0                  | 0                  | 236             | 293               | 0                 |
| Marri         | 0.090 | 139.8         | 198.9         | 184.8        | 213              | 257                | 293                | 0                  | 0                  | 236             | 293               | 0                 |
| Marri         | 0.110 | 140.0         | 194.5         | 186.8        | 213              | 257                | 293                | 0                  | 0                  | 242             | 293               | 0                 |
| Marri         | 0.120 | 140.5         | 194.5         | 187.8        | 213              | 247                | 292                | 0                  | 0                  | 242             | 261               | 291               |
| Marri         | 0.150 | 139.9         | 192.1         | 189.7        | 213              | 247                | 291                | 0                  | 0                  | 242             | 261               | 291               |
| Marri         | 0.185 | 139.3         | 190.4         | 193.9        | 213              | 254                | 286                | 0                  | 0                  | 242             | 261               | 291               |
| Marri         | 0.240 | 139.8         | 187.6         | 195.0        | 214              | 252                | 259                | 283                | 0                  | 242             | 261               | 291               |
| Marri         | 0.275 | 139.9         | 192.1         | 191.5        | 222              | 262                | 286                | 0                  | 0                  | 242             | 295               | 0                 |
| Marri         | 0.295 | 138.6         | 194.4         | 117.5        | 222              | 262                | 286                | 0                  | 0                  | 239             | 295               | 0                 |
| Marri         | 0.355 | 134.7         | 188.9         | 165.5        | 222              | 248                | 295                | 0                  | 0                  | 233             | 261               | 291               |
| Marri         | 0.380 | 138.4         | 192.6         | 103.3        | 222              | 248                | 268                | 352                | 0                  | 233             | 261               | 291               |
| Marri         | 0.415 | 137.7         | 189.5         | 180.0        | 222              | 248                | 289                | 0                  | 0                  | 237             | 261               | 291               |
| Marri         | 0.420 | 137.5         | 187.4         | 187.3        | 222              | 248                | 289                | 0                  | 0                  | 233             | 261               | 291               |
| Marri         | 0.470 | 139.3         | 197.2         | 196.0        | 226              | 253                | 259                | 0                  | 0                  | 242             | 261               | 288               |

Legend: **Rf2** – retention factor in MPA, **H° DEV 254 nm** – hue equivalent at 254 nm prior to derivatisation, **H° DEV 366 nm** – hue equivalent at 366 nm prior to derivatisation, **H° NP 366 nm** – hue equivalent at 366 nm after derivatisation w/ NP-PEG derivatisation reagent, **Fl DEV  $\lambda$** – fluorescence  $\lambda$  max prior to derivatisation, **Fl DEV  $\lambda$  m** – fluorescence  $\lambda$  min prior to derivatisation, **UV DEV  $\lambda_{1-3}$** – UV-Vis  $\lambda$  max prior to derivatisation, **Fl NP  $\lambda$** – fluorescence  $\lambda$  max after derivatisation with NP-PEG reagent, **UV NP  $\lambda_{1-3}$** – UV-Vis  $\lambda$  max after derivatisation with NP-PEG reagent

**Supplementary Table S14:** Summary of the data used to determine the identity of the unknown bands in *Corymbia calophylla* (Marri) honey (Database 2B)

| Name and Code | Rf 2  | H° DEV 254 nm | H° DEV 366 nm | H° VSA 366 nm | H° T VSA | Fl DEV $\lambda$ | Fl DEV $\lambda$ m | UV DEV $\lambda_1$ | UV DEV $\lambda_2$ | UV DEV $\lambda_3$ | Fl VS $\lambda$ | UV VS $\lambda$ |
|---------------|-------|---------------|---------------|---------------|----------|------------------|--------------------|--------------------|--------------------|--------------------|-----------------|-----------------|
| Marri         | 0.055 | 139.7         | 197.0         | 204.3         | 12.0     | 220              | 255                | 289                | 0                  | 0                  | 258             | 385             |
| Marri         | 0.080 | 140.3         | 196.0         | 201.3         | 14.0     | 209              | 257                | 289                | 0                  | 0                  | 250             | 384             |
| Marri         | 0.095 | 140.3         | 196.0         | 201.7         | 14.0     | 213              | 257                | 289                | 0                  | 0                  | 248             | 385             |
| Marri         | 0.115 | 139.5         | 193.0         | 201.6         | 12.0     | 213              | 257                | 289                | 0                  | 0                  | 245             | 387             |
| Marri         | 0.135 | 139.9         | 195.0         | 201.3         | 13.0     | 213              | 247                | 289                | 0                  | 0                  | 248             | 386             |
| Marri         | 0.145 | 139.3         | 194.0         | 200.5         | 15.0     | 213              | 247                | 288                | 0                  | 0                  | 248             | 388             |
| Marri         | 0.165 | 139.9         | 191.0         | 203.8         | 8.9      | 213              | 254                | 288                | 0                  | 0                  | 247             | 386             |
| Marri         | 0.195 | 140           | 188.0         | 211.0         | 7.8      | 213              | 252                | 288                | 0                  | 0                  | 254             | 385             |
| Marri         | 0.245 | 139.1         | 182.0         | 207.8         | 16.0     | 214              | 252                | 256                | 0                  | 0                  | 250             | 460             |
| Marri         | 0.285 | 140.3         | 192.0         | 209.3         | 5.3      | 222              | 262                | 285                | 0                  | 0                  | 248             | 385             |
| Marri         | 0.300 | 140.1         | 198.0         | 207.1         | 1.7      | 222              | 262                | 286                | 0                  | 0                  | 248             | 386             |
| Marri         | 0.370 | 135.0         | 189.0         | 237.7         | 358.0    | 222              | 248                | 262                | 340                | 0                  | 261             | 495             |
| Marri         | 0.395 | 139.2         | 191.0         | 212.1         | 344.0    | 222              | 248                | 262                | 340                | 0                  | 258             | 383             |
| Marri         | 0.430 | 137.9         | 190.0         | 210.8         | 1.4      | 222              | 248                | 289                | 0                  | 0                  | 258             | 385             |
| Marri         | 0.475 | 139.0         | 192.0         | 203.7         | 2.4      | 226              | 253                | 257                | 0                  | 0                  | 256             | 387             |

Legend: **Rf2** – retention factor in MPB, **H° DEV 254 nm** – hue and colour equivalent at 254 nm prior to derivatisation, **H° DEV 366 nm** – hue and colour equivalent at 366 nm prior to derivatisation, **H° VSA 366 nm** – hue and colour equivalent at 366 nm after derivatisation w/ VSA derivatisation reagent, **H° T VSA** – hue and colour equivalent at transmittance in white light after derivatisation w/ VSA derivatisation reagent; **Fl DEV  $\lambda$  max**– fluorescence  $\lambda$  max prior to derivatisation, **Fl DEV  $\lambda$  m**– fluorescence  $\lambda$  min prior to derivatisation, **UV DEV  $\lambda_{1-3}$** – UV-Vis  $\lambda$  max prior to derivatisation, **Fl VS  $\lambda$** – fluorescence  $\lambda$  max after derivatisation with VSA reagent, **UV VS  $\lambda$** – UV-Vis  $\lambda$  max after derivatisation with VSA reagent



**Supplementary Table S15:** Summary of the data used to determine the identity of the unknown bands in *Eucalyptus marginata* (Jarrah) honey (Database 1A)

| Name and Code | Rf 1  | H° DEV 254 nm | H° DEV 366 nm | H° NP 366 nm | Fl DEV $\lambda$ | Fl DEV $\lambda$ m | UV DEV $\lambda_1$ | UV DEV $\lambda_2$ | UV DEV $\lambda_3$ | Fl NP $\lambda$ | UV NP $\lambda_1$ | UV NP $\lambda_2$ |
|---------------|-------|---------------|---------------|--------------|------------------|--------------------|--------------------|--------------------|--------------------|-----------------|-------------------|-------------------|
| Jarrah        | 0.015 | 138.0         | 195.0         | 190.0        | 223              | 251                | 284                |                    |                    | 247             | 298               |                   |
| Jarrah        | 0.043 | 139.0         | 197.0         | 194.0        | 223              | 252                | 290                |                    |                    | 250             | 298               |                   |
| Jarrah        | 0.072 | 139.0         | 193.0         | 194.0        | 223              | 255                | 275                |                    |                    | 248             | 298               |                   |
| Jarrah        | 0.117 | 139.0         | 192.0         | 195.0        | 222              | 252                | 286                |                    |                    | 250             | 295               |                   |
| Jarrah        | 0.139 | 139.0         | 176.0         | 194.0        | 223              | 252                | 281                |                    |                    | 250             | 301               |                   |
| Jarrah        | 0.196 | 139.0         | 194.0         | 194.0        | 223              | 252                | 291                |                    |                    | 250             | 317               |                   |
| Jarrah        | 0.241 | 139.0         | 193.0         | 195.0        | 222              | 252                | 281                |                    |                    | 250             | 316               |                   |
| Jarrah        | 0.320 | 138.0         | 192.0         | 199.0        | 222              | 252                | 247                |                    |                    | 250             | 296               |                   |
| Jarrah        | 0.371 | 138.0         | 192.0         | 197.0        | 221              | 252                | 286                |                    |                    | 248             | 293               |                   |
| Jarrah        | 0.398 | 138.0         | 193.0         | 198.0        | 221              | 248                | 281                |                    |                    | 250             | 294               |                   |
| Jarrah        | 0.471 | 144.0         | 191.0         | 198.0        | 222              | 250                | 261                | 358                |                    | 246             | 297               |                   |
| Jarrah        | 0.487 | 140.0         | 192.0         | 198.0        | 221              | 248                | 286                |                    |                    | 245             | 298               | 393               |
| Jarrah        | 0.538 | 137.0         | 196.0         | 194.0        | 223              | 248                | 288                |                    |                    | 245             | 297               | 393               |
| Jarrah        | 0.562 | 136.0         | 196.0         | 195.0        | 222              | 248                | 288                |                    |                    | 245             | 295               |                   |
| Jarrah        | 0.633 | 139.0         | 202.0         | 193.0        | 225              | 252                | 259                |                    |                    | 246             | 294               |                   |

Legend: **Rf1** – retention factor in MPA, **H° DEV 254 nm** – hue equivalent at 254 nm prior to derivatisation, **H° DEV 366 nm** – hue equivalent at 366 nm prior to derivatisation, **H° NP 366 nm** – hue equivalent at 366 nm after derivatisation w/ NP-PEG derivatisation reagent, **Fl DEV  $\lambda$** – fluorescence  $\lambda$  max prior to derivatisation, **Fl DEV  $\lambda$  m** – fluorescence  $\lambda$  min prior to derivatisation, **UV DEV  $\lambda_{1-3}$**  – UV-Vis  $\lambda$  max prior to derivatisation, **Fl NP  $\lambda$** – fluorescence  $\lambda$  max after derivatisation with NP-PEG reagent, **UV NP  $\lambda_{1-3}$** – UV-Vis  $\lambda$  max after derivatisation with NP-PEG reagent

**Supplementary Table S16:** Summary of the data used to determine the identity of the unknown bands in *Eucalyptus marginata* (Jarrah) honey (Database 1B)

| Name and Code | Rf 1  | H° DEV 254 nm | H° DEV 366 nm | H° VSA 366 nm | H° T VSA | FI DEV $\lambda$ | FI DEV $\lambda$ m | UV DEV $\lambda_1$ | UV DEV $\lambda_2$ | UV DEV $\lambda_3$ | FI VS $\lambda$ | UV VS $\lambda$ |
|---------------|-------|---------------|---------------|---------------|----------|------------------|--------------------|--------------------|--------------------|--------------------|-----------------|-----------------|
| Jarrah        | 0.700 | 138.0         | 160.0         | 210.0         | 5.0      | 223              | 238                | 292                | 0                  | 0                  | 250             | 367             |
| Jarrah        | 0.015 | 138.0         | 195.0         | 210.0         | 20.0     | 223              | 251                | 284                | 0                  | 0                  | 254             | 392             |
| Jarrah        | 0.043 | 139.0         | 197.0         | 219.0         | 23.0     | 223              | 252                | 290                | 0                  | 0                  | 250             | 380             |
| Jarrah        | 0.072 | 139.0         | 193.0         | 211.0         | 21.0     | 223              | 255                | 275                | 0                  | 0                  | 250             | 379             |
| Jarrah        | 0.117 | 139.0         | 192.0         | 208.0         | 20.0     | 222              | 252                | 286                | 0                  | 0                  | 249             | 380             |
| Jarrah        | 0.139 | 139.0         | 176.0         | 210.0         | 18.0     | 223              | 252                | 281                | 0                  | 0                  | 250             | 383             |
| Jarrah        | 0.196 | 139.0         | 194.0         | 203.0         | 18.0     | 223              | 252                | 291                | 0                  | 0                  | 249             | 379             |
| Jarrah        | 0.241 | 139.0         | 193.0         | 204.0         | 19.0     | 222              | 252                | 281                | 0                  | 0                  | 249             | 383             |
| Jarrah        | 0.320 | 138.0         | 192.0         | 210.0         | 22.0     | 222              | 252                | 247                | 0                  | 0                  | 249             | 383             |
| Jarrah        | 0.371 | 138.0         | 192.0         | 211.0         | 16.0     | 221              | 252                | 286                | 0                  | 0                  | 250             | 380             |
| Jarrah        | 0.398 | 138.0         | 193.0         | 212.0         | 17.0     | 221              | 248                | 281                |                    | 0                  | 250             | 383             |
| Jarrah        | 0.471 | 144.0         | 191.0         | 215.0         | 4.0      | 222              | 250                | 261                | 358                | 0                  | 250             | 380             |
| Jarrah        | 0.487 | 140.0         | 192.0         | 216.0         | 11.0     | 221              | 248                | 286                | 0                  | 0                  | 250             | 386             |
| Jarrah        | 0.538 | 137.0         | 196.0         | 228.0         | 11.0     | 223              | 248                | 288                | 0                  | 0                  | 252             | 379             |
| Jarrah        | 0.562 | 136.0         | 196.0         | 231.0         | 340.0    | 222              | 248                | 288                | 0                  | 0                  | 252             | 380             |
| Jarrah        | 0.633 | 139.0         | 202.0         | 209.0         | 12.0     | 225              | 252                | 259                | 0                  | 0                  | 249             | 369             |

Legend: **Rf1** – retention factor in MPB, **H° DEV 254 nm** – hue and colour equivalent at 254 nm prior to derivatisation, **H° DEV 366 nm** – hue and colour equivalent at 366 nm prior to derivatisation, **H° VSA 366 nm** – hue and colour equivalent at 366 nm after derivatisation w/ VSA derivatisation reagent, **H° T VSA** – hue and colour equivalent at transmittance in white light after derivatisation w/ VSA derivatisation reagent; **FI DEV  $\lambda$  max**– fluorescence  $\lambda$  max prior to derivatisation, **FI DEV  $\lambda$  m**– fluorescence  $\lambda$  min prior to derivatisation, **UV DEV  $\lambda_{1-3}$** – UV-Vis  $\lambda$  max prior to derivatisation, **FI VS  $\lambda$** – fluorescence  $\lambda$  max after derivatisation with VSA reagent, **UV VS  $\lambda$** – UV-Vis  $\lambda$  max after derivatisation with VSA reagent

**Supplementary Table S17:** Summary of the data used to determine the identity of the unknown bands in *Eucalyptus marginata* (Jarrah) honey (Database 2A)

| Name and Code | Rf 2  | H° DEV 254 nm | H° DEV 366 nm | H° NP 366 nm | FI DEV $\lambda$ | FI DEV $\lambda$ m | UV DEV $\lambda_1$ | UV DEV $\lambda_2$ | UV DEV $\lambda_3$ | FI NP $\lambda$ | UV NP $\lambda_1$ | UV NP $\lambda_2$ |
|---------------|-------|---------------|---------------|--------------|------------------|--------------------|--------------------|--------------------|--------------------|-----------------|-------------------|-------------------|
| Jarrah        | 0.070 | 140.9         | 215.3         | 193.8        | 210              | 249                | 300                | 0                  | 0                  | 236             | 315               | 0                 |
| Jarrah        | 0.100 | 140.3         | 191.2         | 193.9        | 222              | 251                | 287                | 0                  | 0                  | 242             | 305               | 0                 |
| Jarrah        | 0.140 | 140.3         | 195.5         | 194.1        | 203              | 248                | 287                | 0                  | 0                  | 237             | 297               | 0                 |
| Jarrah        | 0.185 | 138.9         | 191.6         | 196.0        | 219              | 255                | 288                | 0                  | 0                  | 236             | 293               | 0                 |
| Jarrah        | 0.270 | 144.4         | 193.0         | 195.2        | 223              | 254                | 264                | 358                | 0                  | 242             | 301               | 0                 |
| Jarrah        | 0.290 | 138.7         | 193.3         | 94.2         | 223              | 254                | 286                | 0                  | 0                  | 239             | 307               | 0                 |
| Jarrah        | 0.330 | 139.7         | 195.2         | 102.2        | 222              | 255                | 287                | 0                  | 0                  | 239             | 301               | 0                 |
| Jarrah        | 0.355 | 136.8         | 192.6         | 178.4        | 222              | 248                | 293                | 0                  | 0                  | 231             | 297               | 0                 |
| Jarrah        | 0.385 | 139.8         | 195.5         | 173.2        | 222              | 248                | 297                | 0                  | 0                  | 242             | 301               | 435               |
| Jarrah        | 0.430 | 139.1         | 194.7         | 184.0        | 222              | 248                | 297                | 0                  | 0                  | 239             | 303               | 0                 |
| Jarrah        | 0.460 | 140.3         | 202.9         | 196.1        | 228              | 245                | 285                | 0                  | 0                  | 242             | 295               | 0                 |
| Jarrah        | 0.475 | 139.8         | 199.4         | 196.1        | 226              | 255                | 258                | 0                  | 0                  | 239             | 296               | 0                 |
| Jarrah        | 0.525 | 139.9         | 194.2         | 195.2        | 207              | 251                | 287                | 0                  | 0                  | 248             | 303               | 0                 |

Legend: **Rf2** – retention factor in MPA, **H° DEV 254 nm** – hue equivalent at 254 nm prior to derivatisation, **H° DEV 366 nm** – hue equivalent at 366 nm prior to derivatisation, **H° NP 366 nm** – hue equivalent at 366 nm after derivatisation w/ NP-PEG derivatisation reagent, **FI DEV  $\lambda$** – fluorescence  $\lambda$  max prior to derivatisation, **FI DEV  $\lambda$  m** – fluorescence  $\lambda$  min prior to derivatisation, **UV DEV  $\lambda_{1-3}$**  – UV-Vis  $\lambda$  max prior to derivatisation, **FI NP  $\lambda$** – fluorescence  $\lambda$  max after derivatisation with NP-PEG reagent, **UV NP  $\lambda_{1-3}$** – UV-Vis  $\lambda$  max after derivatisation with NP-PEG reagent

**Supplementary Table S18:** Summary of the data used to determine the identity of the unknown bands in *Eucalyptus marginata* (Jarrah) honey (Database 2B)

| Name and Code | Rf 2  | H° DEV 254 nm | H° DEV 366 nm | H° VSA 366 nm | H° T VSA | Fl DEV $\lambda$ | Fl DEV $\lambda$ m | UV DEV $\lambda_1$ | UV DEV $\lambda_2$ | UV DEV $\lambda_3$ | Fl VS $\lambda$ | UV VS $\lambda$ |
|---------------|-------|---------------|---------------|---------------|----------|------------------|--------------------|--------------------|--------------------|--------------------|-----------------|-----------------|
| Jarrah        | 0.065 | 140.4         | 190.3         | 200.6         | 0.9      | 208              | 252                | 298                | 0                  | 0                  | 258             | 383             |
| Jarrah        | 0.080 | 140.4         | 201.4         | 200.2         | 11.4     | 210              | 249                | 299                | 0                  | 0                  | 258             | 383             |
| Jarrah        | 0.105 | 139.5         | 188.4         | 205.0         | 9.4      | 222              | 251                | 293                | 0                  | 0                  | 254             | 386             |
| Jarrah        | 0.135 | 139.8         | 191.6         | 205.8         | 12.5     | 203              | 248                | 289                | 0                  | 0                  | 255             | 387             |
| Jarrah        | 0.150 | 140.0         | 193.9         | 207.9         | 18.8     | 208              | 251                | 288                | 0                  | 0                  | 255             | 477             |
| Jarrah        | 0.195 | 138.4         | 189.3         | 207.6         | 8.9      | 219              | 255                | 288                | 0                  | 0                  | 258             | 387             |
| Jarrah        | 0.285 | 143.2         | 191.8         | 206.2         | 14.2     | 223              | 254                | 264                | 356                | 0                  | 256             | 477             |
| Jarrah        | 0.305 | 140.6         | 193.0         | 204.9         | 17.8     | 222              | 255                | 286                | 0                  | 0                  | 258             | 477             |
| Jarrah        | 0.345 | 140.3         | 192.2         | 212.6         | 1.0      | 222              | 248                | 288                | 0                  | 0                  | 256             | 477             |
| Jarrah        | 0.365 | 140.3         | 192.2         | 212.6         | 1.0      | 222              | 248                | 290                | 0                  | 0                  | 261             | 483             |
| Jarrah        | 0.375 | 136.5         | 192.2         | 232.7         | 352.9    | 222              | 247                | 293                | 0                  | 0                  | 261             | 483             |
| Jarrah        | 0.395 | 139.8         | 193.6         | 209.6         | 351.6    | 222              | 248                | 296                | 0                  | 0                  | 258             | 384             |
| Jarrah        | 0.430 | 138.8         | 192.2         | 197.9         | 3.9      | 222              | 248                | 297                | 0                  | 0                  | 251             | 383             |
| Jarrah        | 0.465 | 140.7         | 199.4         | 206.7         | 0.0      | 226              | 245                | 282                | 0                  | 0                  | 250             | 386             |
| Jarrah        | 0.48  | 139.7         | 199.8         | 205.4         | 1.4      | 226              | 255                | 257                | 0                  | 0                  | 250             | 387             |
| Jarrah        | 0.535 | 139.8         | 192.7         | 203.7         | 4.6      | 207              | 252                | 287                | 0                  | 0                  | 248             | 386             |
| Jarrah        | 0.545 | 139.8         | 192.7         | 203.7         | 4.6      | 207              | 252                | 251                | 0                  | 0                  | 250             | 386             |

Legend: **Rf2** – retention factor in MPB, **H° DEV 254 nm** – hue and colour equivalent at 254 nm prior to derivatisation, **H° DEV 366 nm** – hue and colour equivalent at 366 nm prior to derivatisation, **H° VSA 366 nm** – hue and colour equivalent at 366 nm after derivatisation w/ VSA derivatisation reagent, **H° T VSA** – hue and colour equivalent at transmittance in white light after derivatisation w/ VSA derivatisation reagent; **Fl DEV  $\lambda$  max**– fluorescence  $\lambda$  max prior to derivatisation, **Fl DEV  $\lambda$  m**– fluorescence  $\lambda$  min prior to derivatisation, **UV DEV  $\lambda_{1-3}$** – UV-Vis  $\lambda$  max prior to derivatisation, **Fl VS  $\lambda$** – fluorescence  $\lambda$  max after derivatisation with VSA reagent, **UV VS  $\lambda$** – UV-Vis  $\lambda$  max after derivatisation with VSA reagent

**Supplementary Table S19:** Parameters used in Optimising the Quantification of Phenolic Compounds in Honey

| Parameters                  |                           | Correlation (R <sup>2</sup> ) | Accuracy | Regression Mode | Remarks                                                                                                      |
|-----------------------------|---------------------------|-------------------------------|----------|-----------------|--------------------------------------------------------------------------------------------------------------|
| Concentration (application) | 500 µg/mL                 | <0.99                         | >±5%     | Polynomial      | Match compounds were mixed in order to save time and resources                                               |
|                             | 100 µg/mL                 | <0.99                         | >±5%     | Polynomial      |                                                                                                              |
|                             | 5-50 µg/mL                | >0.99                         | <±5%     | Linear          |                                                                                                              |
| Volume (application)        | 5.0-25.0 µL               | >0.99                         | >±5%     | Polynomial      | Lower volume application was favoured in order to save time in sample injection                              |
|                             | 5.0-12.5 µL               | >0.99                         | <±5%     | Polynomial      |                                                                                                              |
|                             | 5.0 – 9.8 µL              | >0.99                         | <±5%     | Linear          |                                                                                                              |
| Profile                     | 254 nm                    | <0.99                         | >±5%     | Polynomial      | Better correlations and accuracy were observed when the specific λ <sub>max</sub> of the standards were used |
|                             | 366 nm                    | <0.99                         | >±5%     | Polynomial      |                                                                                                              |
|                             | Specific λ <sub>max</sub> | >0.99                         | <±5%     | Linear          |                                                                                                              |
| Derivatisation              | With NP-PEG               | >0.99                         | <±5%     | Linear          | No derivatisation was chosen in order to save time                                                           |
|                             | None                      | >0.99                         | <±5%     | Linear          |                                                                                                              |

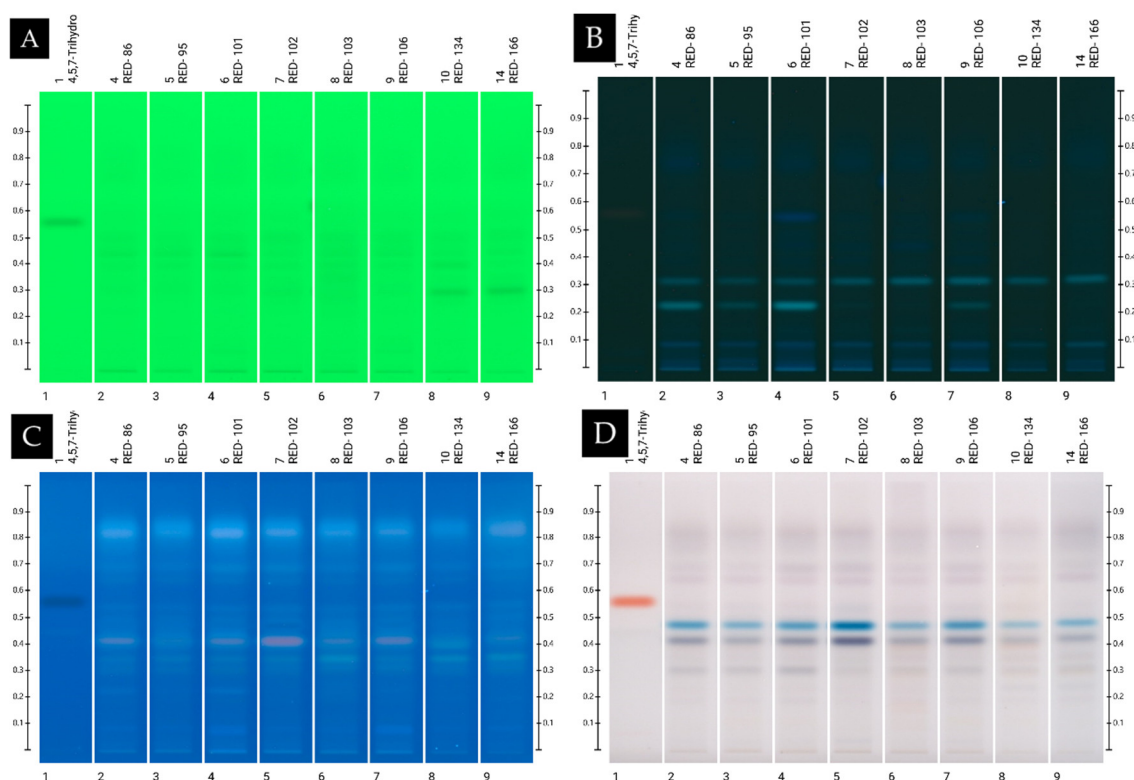

**Supplementary Figure S1.** HPTLC fingerprint patterns for various samples of *Calothamnus* spp. (Red bell, n=8). Plate images taken and obtained under the following light conditions: 254 nm prior to derivatisation (A), 366 nm prior to derivatisation (B), 366 nm after derivatisation with VSA (C), and transmittance in white light after derivatisation with VSA (D).

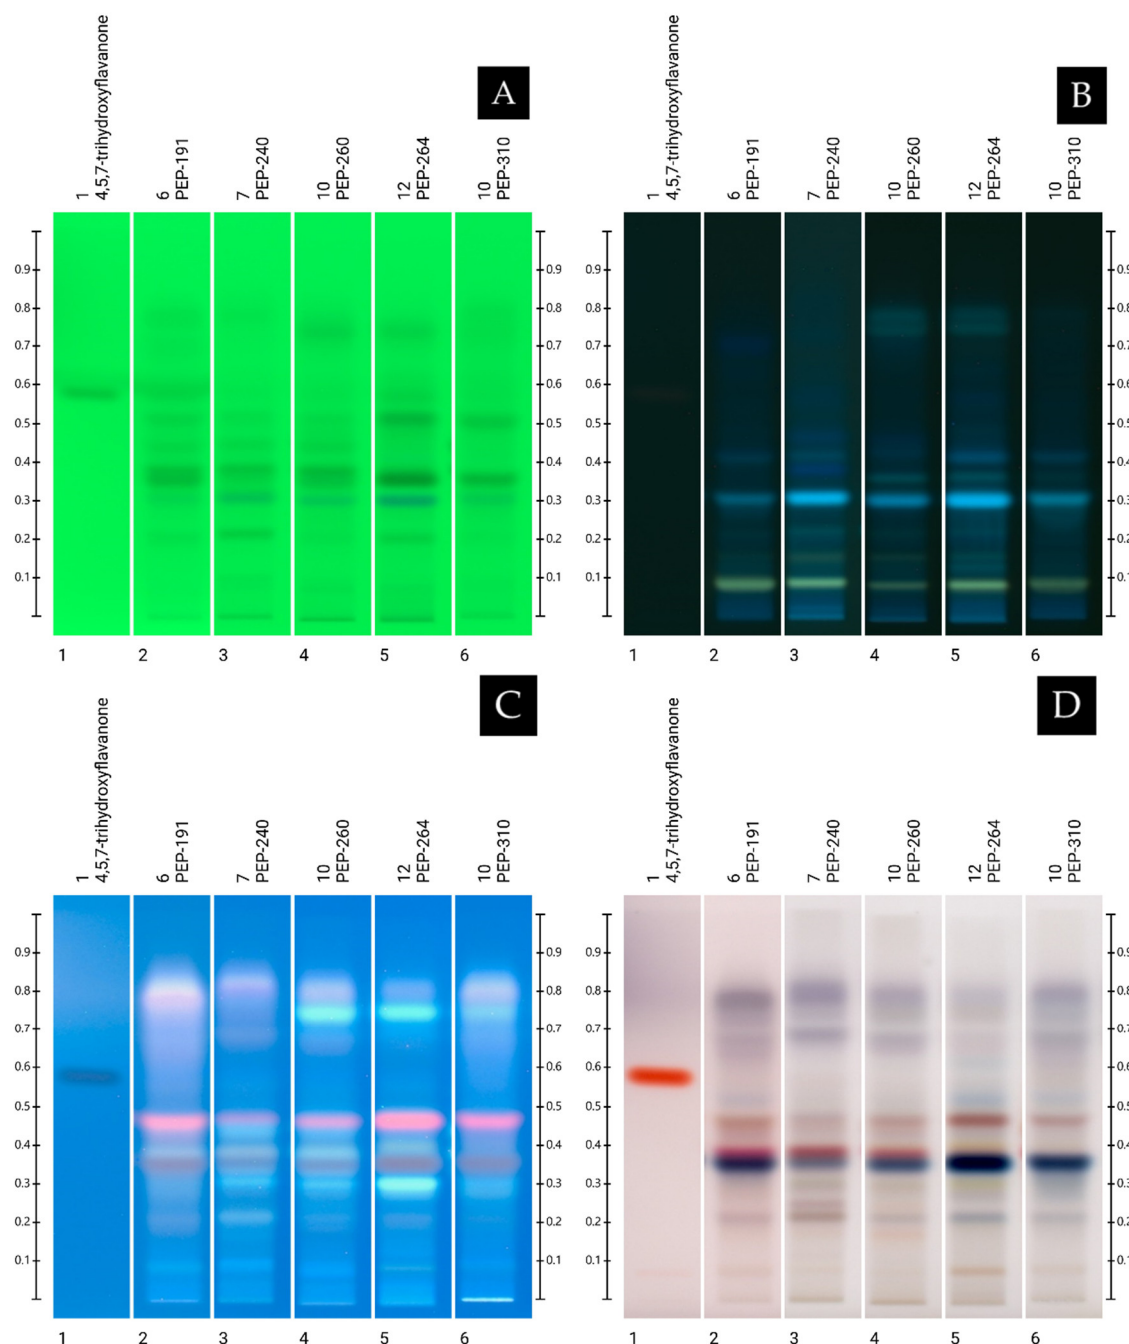

**Supplementary Figure S2.** HPTLC fingerprint patterns for various samples of *Agonis flexuosa* (Coastal Peppermint, n=5). Plate images taken and obtained under the following light conditions: 254 nm prior to derivatisation (A), 366 nm prior to derivatisation (B), 366 nm after derivatisation with VSA (C), and transmittance in white light after derivatisation with VSA (D).



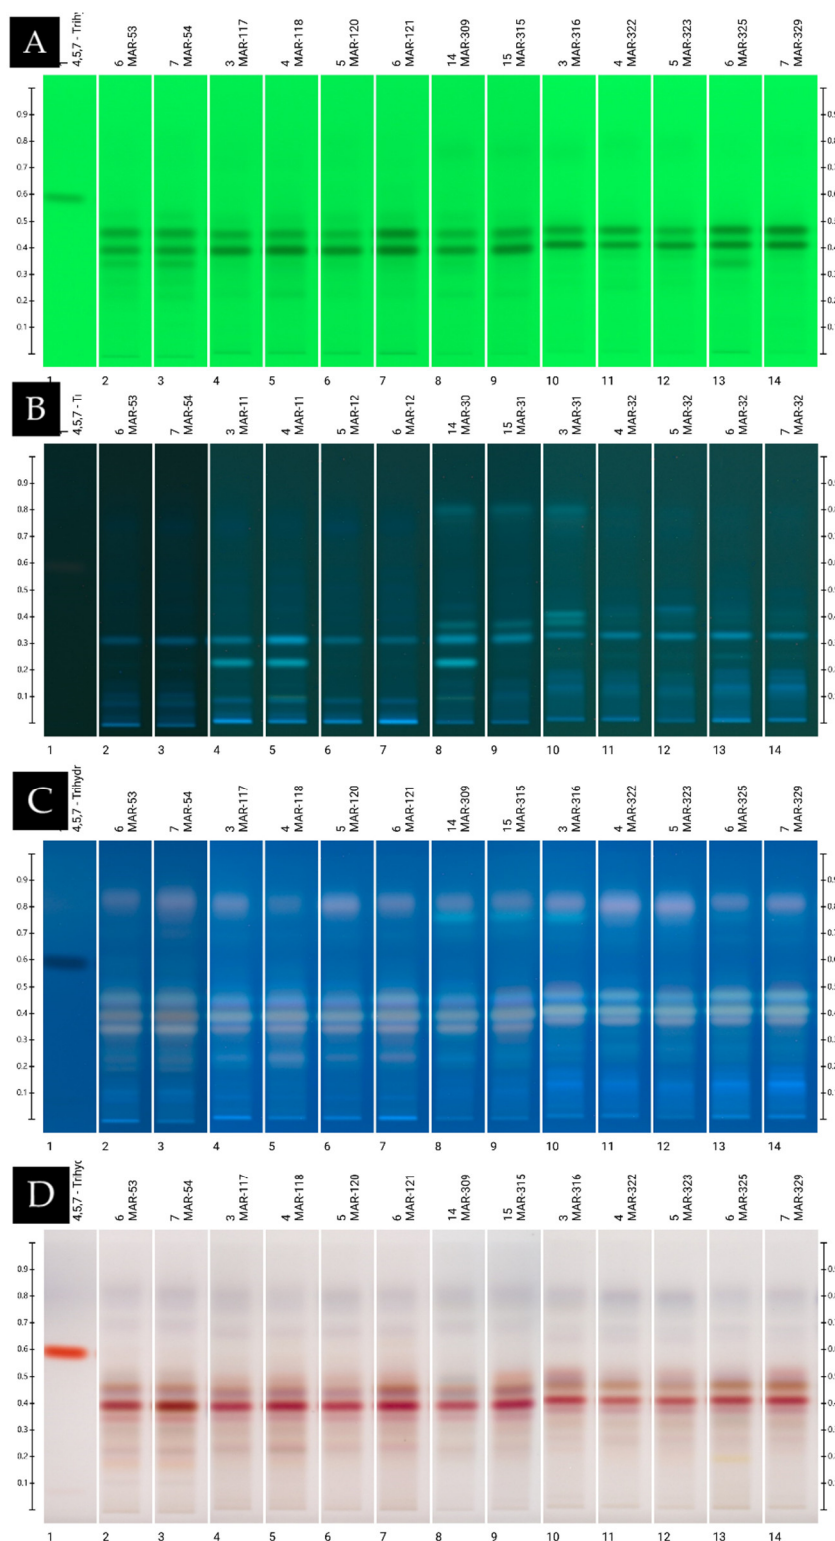

**Supplementary Figure S3.** HPTLC fingerprint patterns for various samples of *Corymbia calophylla* (Marri, n=13). Plate images taken and obtained under the following light conditions: 254 nm prior to derivatisation (**A**), 366 nm prior to derivatisation (**B**), 366 nm after derivatised with VSA (**C**), and transmittance in white light after derivatisation with VSA (**D**).



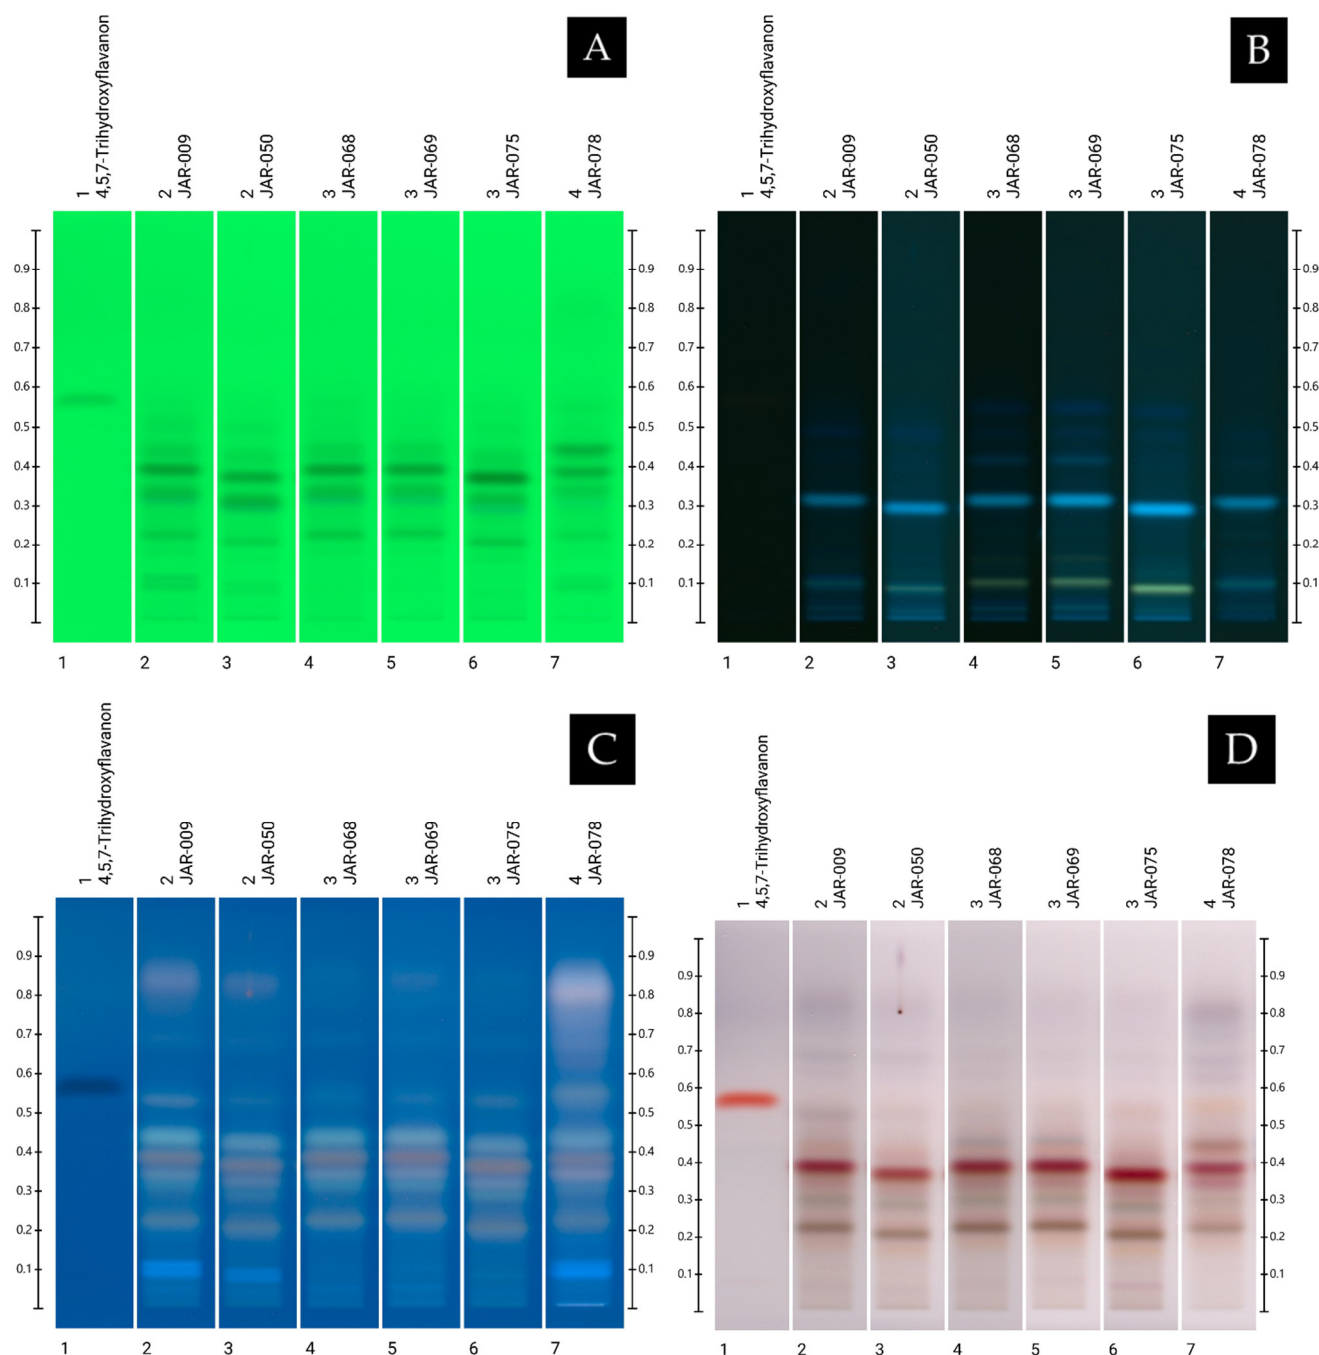

**Supplementary Figure S4.** HPTLC fingerprint patterns for various samples of *Eucalyptus marginata* (Jarrah, n=6). Plate images taken and obtained under the following light conditions: 254 nm prior to derivatisation (A), 366 nm prior to derivatisation (B), 366 nm after derivatised with VSA (C), and transmittance in white light after derivatisation with VSA (D).

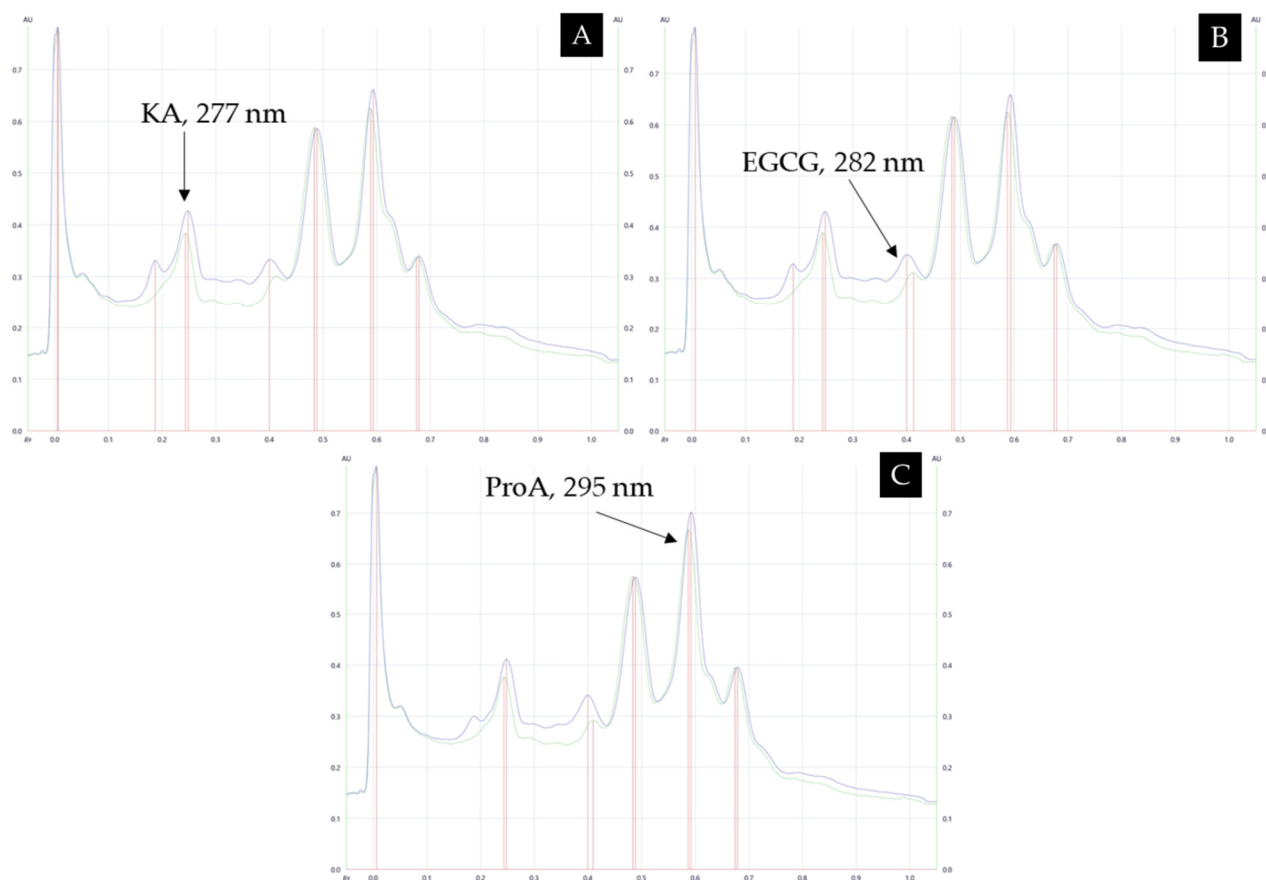

**Supplementary Figure S5 (A-C).** Profile Comparison of *Calothamnus* spp. (Red bell) Honey (green) and *Calothamnus* spp. (Red bell) Honey Spiked with the Identified Compounds Based on Database 1A and 1B (blue) Scanned at the  $\lambda_{\text{max}}$  of Each Specific Compound Prior to Derivatisation

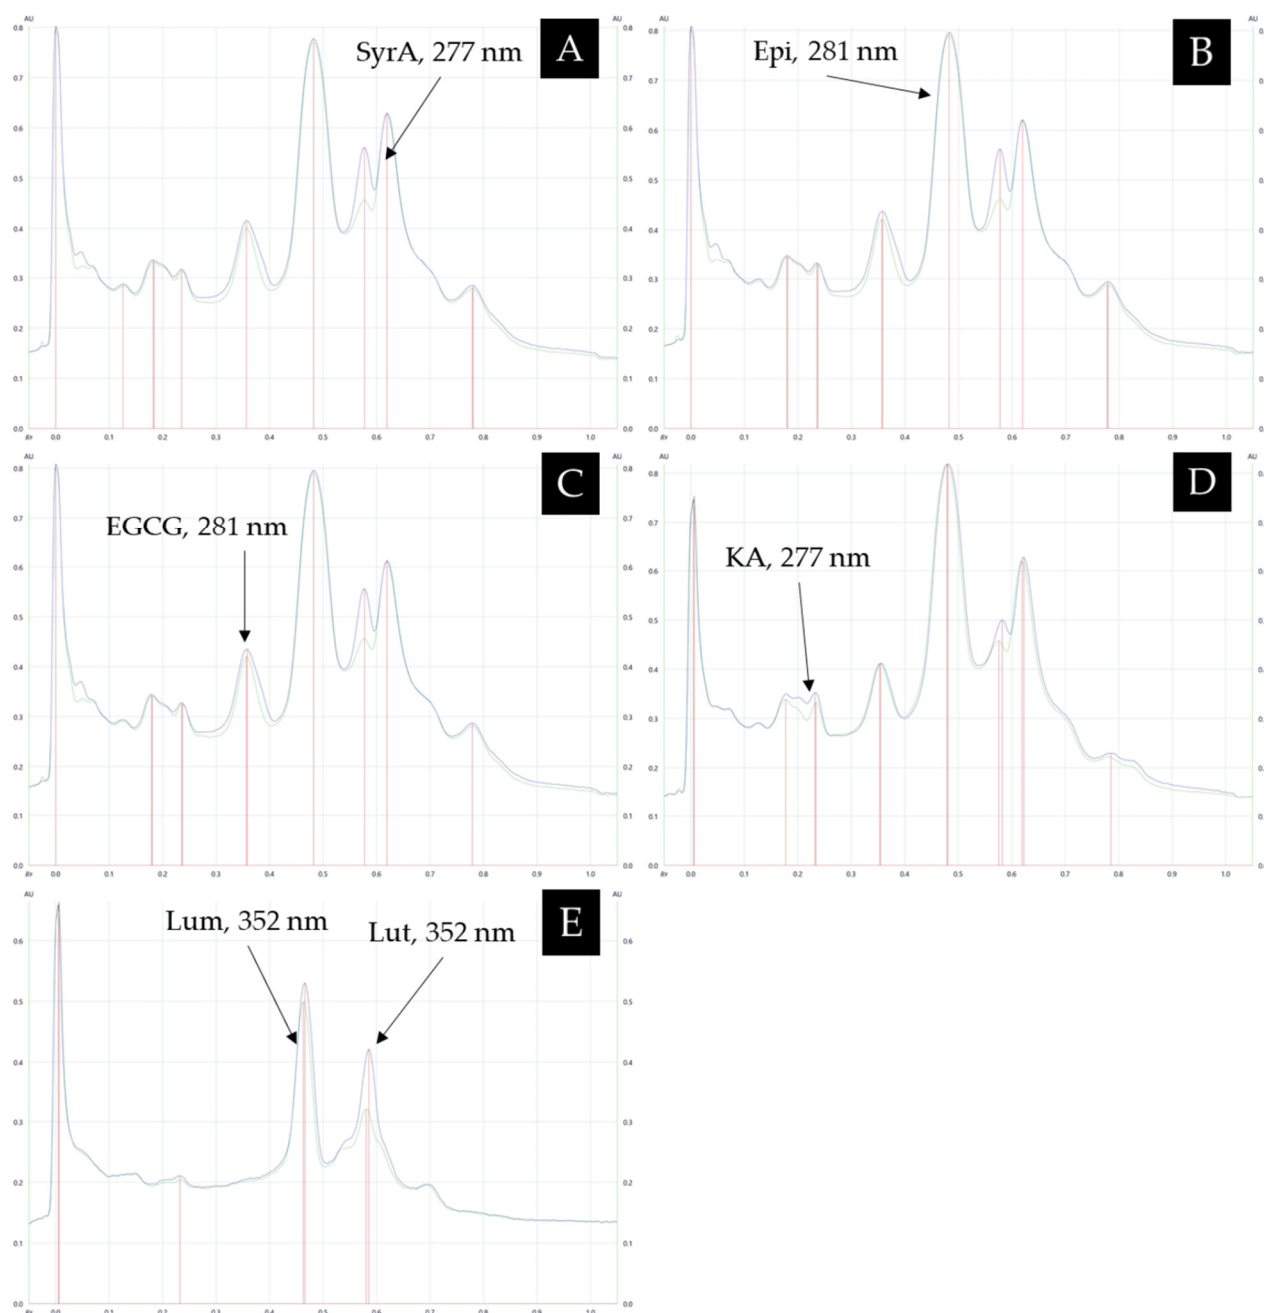

**Supplementary Figure S6 (A-E).** Profile Comparison of *Agonis flexuosa* (Coastal Peppermint) Honey (green) and *Agonis flexuosa* (Coastal Peppermint) Honey Spiked with the Identified Compounds Based on Database 1A and 1B (blue) Scanned at the  $\lambda_{\text{max}}$  of Each Specific Compounds Prior to Cerivatisation

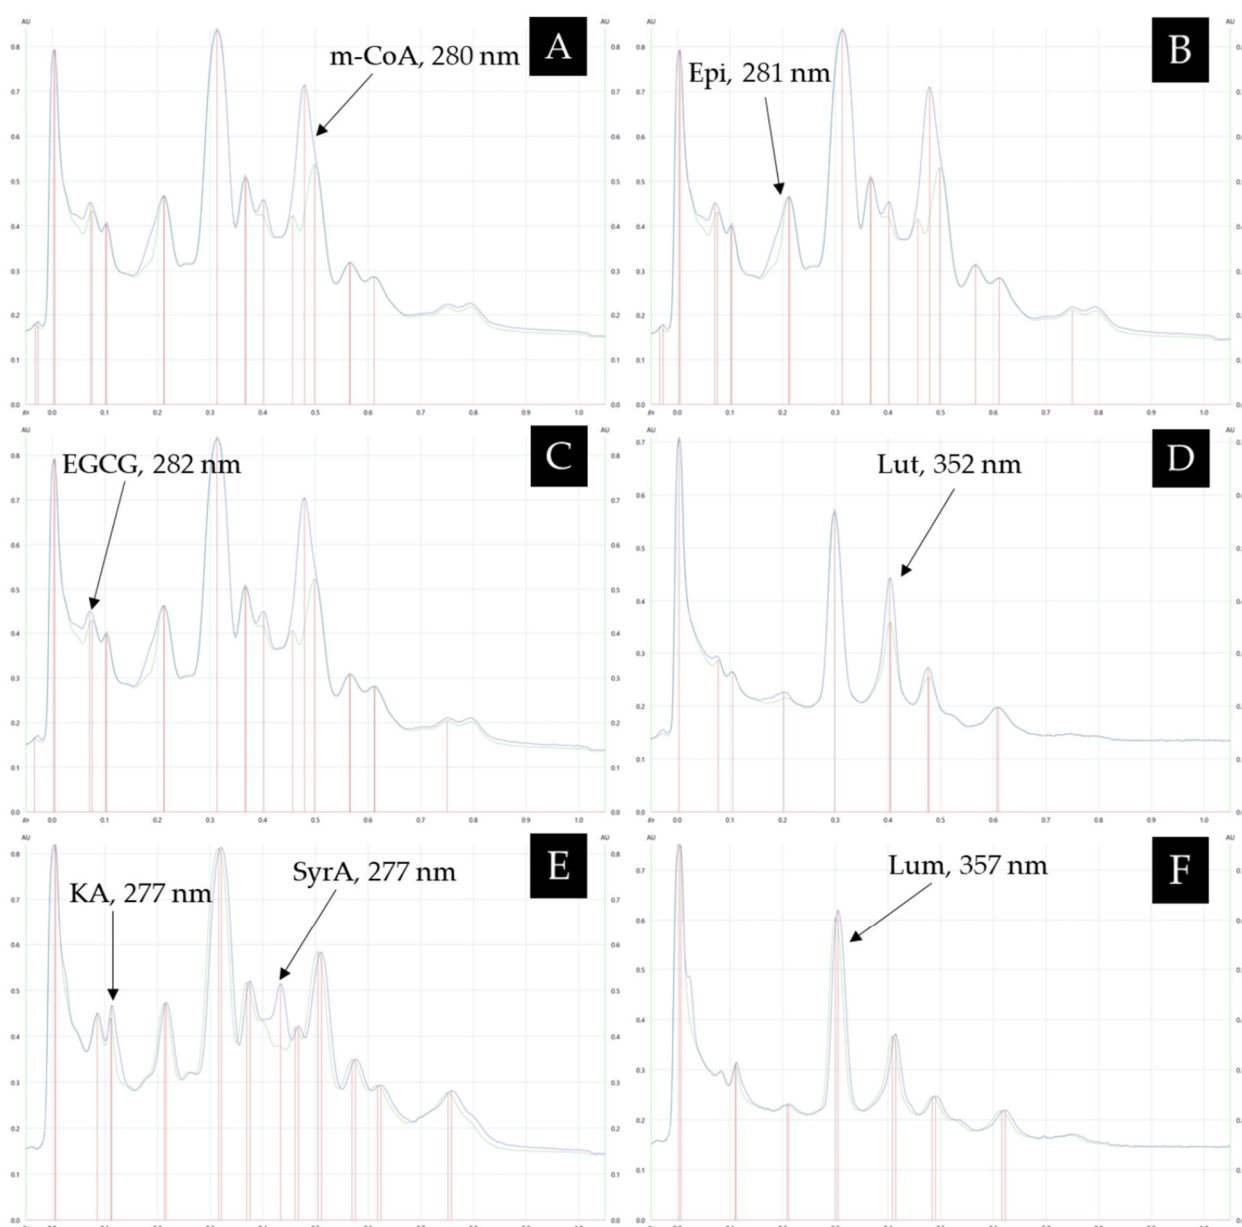

**Supplementary Figure S7 (A-F).** Profile Comparison of *Agonis flexuosa* (Coastal Peppermint) Honey (green) and *Agonis flexuosa* (Coastal Peppermint) Honey Spiked with the Identified Compounds Based on Database 2A and 2B (blue) Scanned at the  $\lambda_{\text{max}}$  of Each Specific Compound Prior to Derivatisation

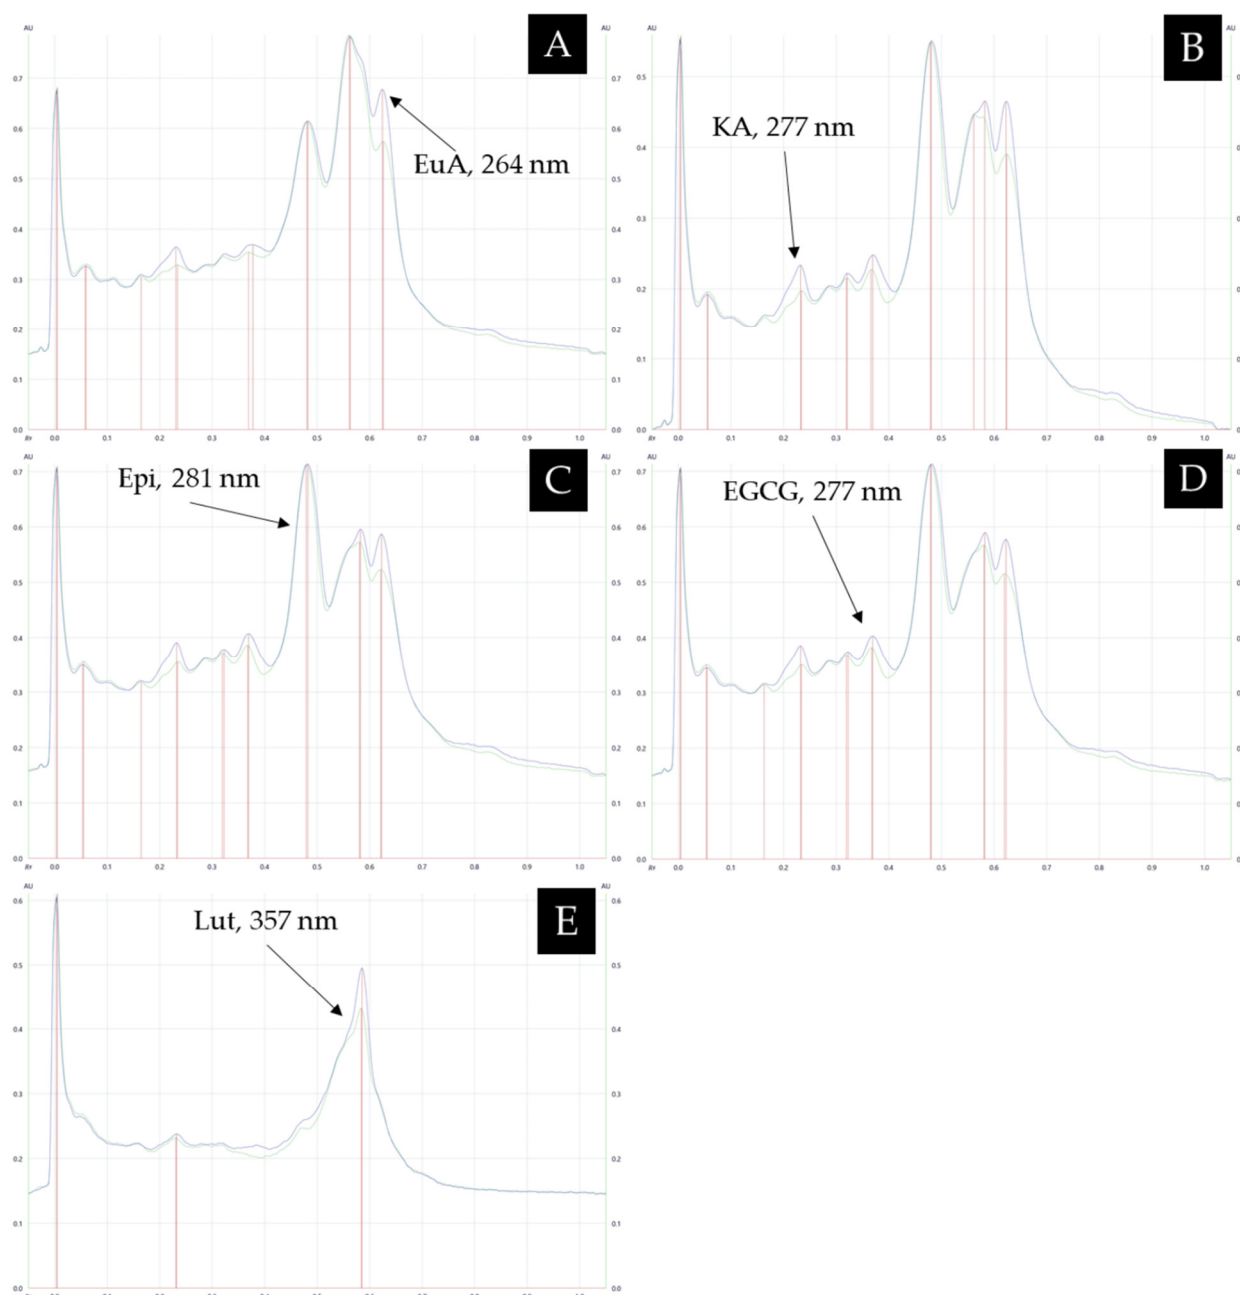

**Supplementary Figure S8 (A-E).** Profile Comparison of *Corymbia calophylla* (Marri) Honey (green) and *Corymbia calophylla* (Marri) Spiked with the Identified Compounds Based on Database 1A and 1B (blue) scanned at the  $\lambda_{\text{max}}$  of Each Specific Compound Prior to Derivatisation

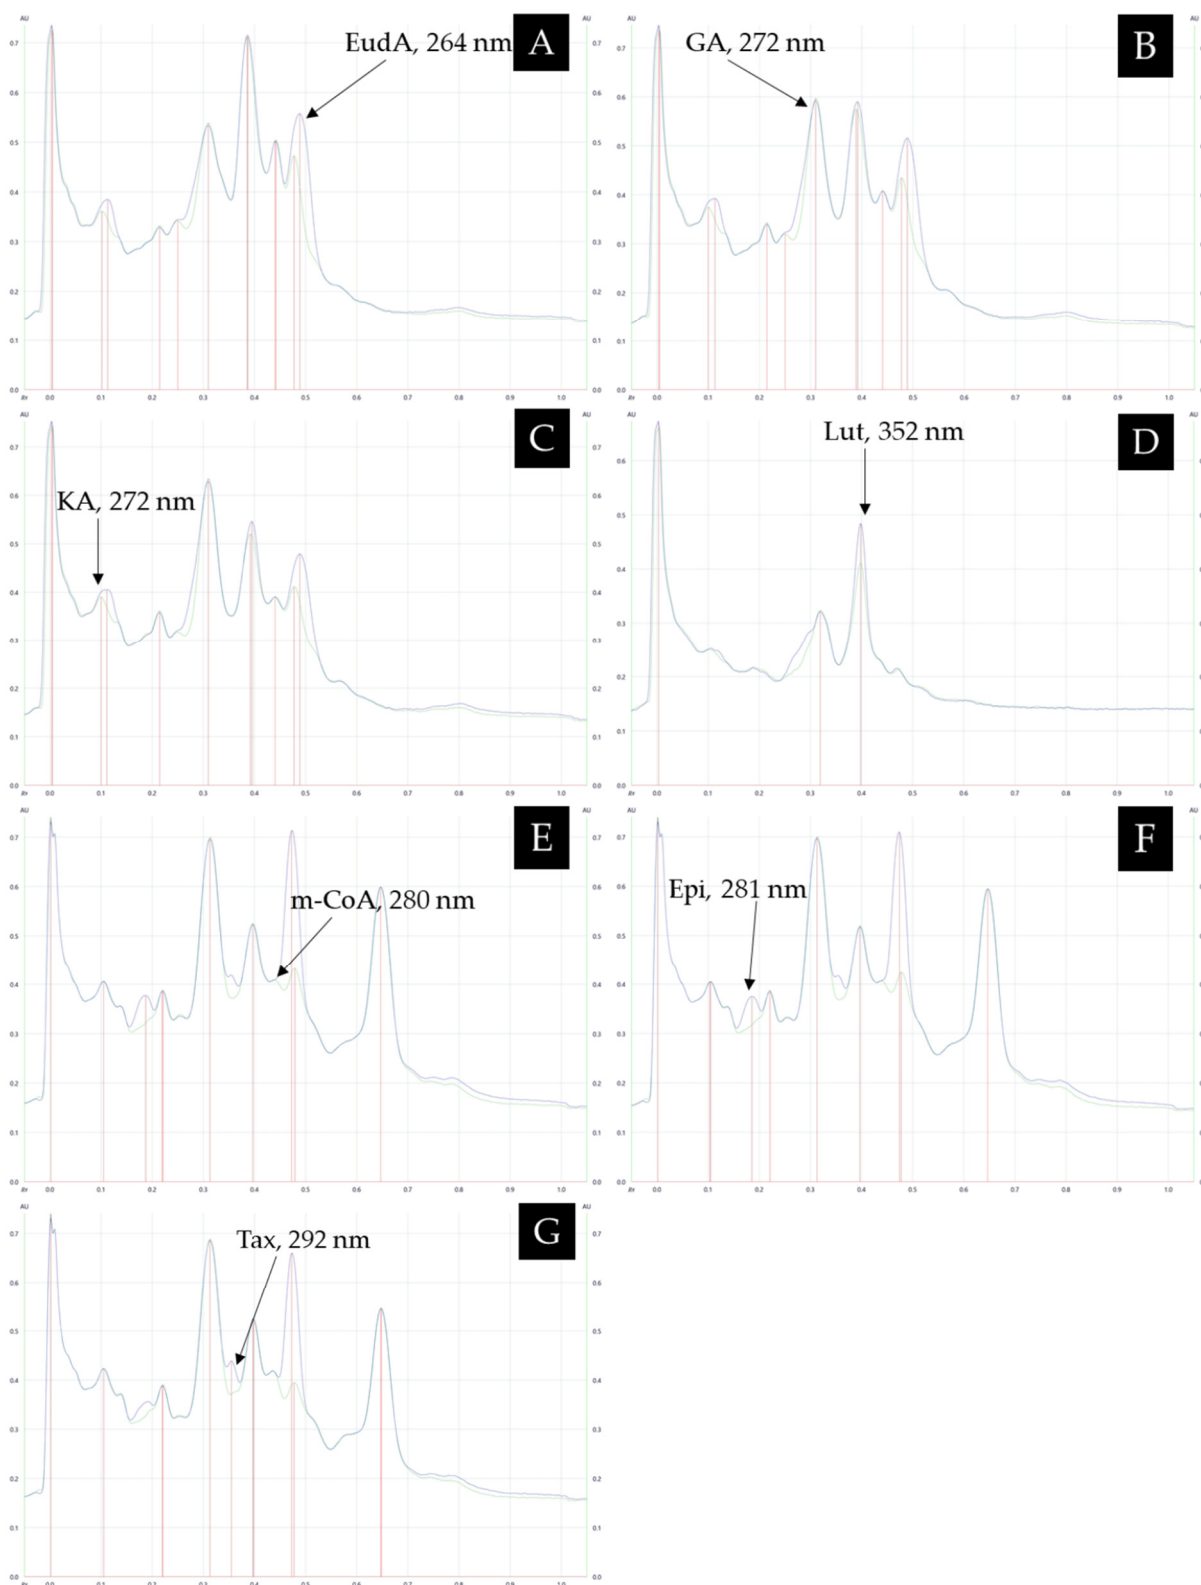

**Supplementary Figure S9 (A-G).** Profile Comparison of *Corymbia calophylla* (Marri) Honey (green) and *Corymbia calophylla* (Marri) Spiked with the Identified Compounds Based on Database 2A and 2B (blue) Scanned at the  $\lambda_{max}$  of Each Specific Compound Prior to Derivatisation

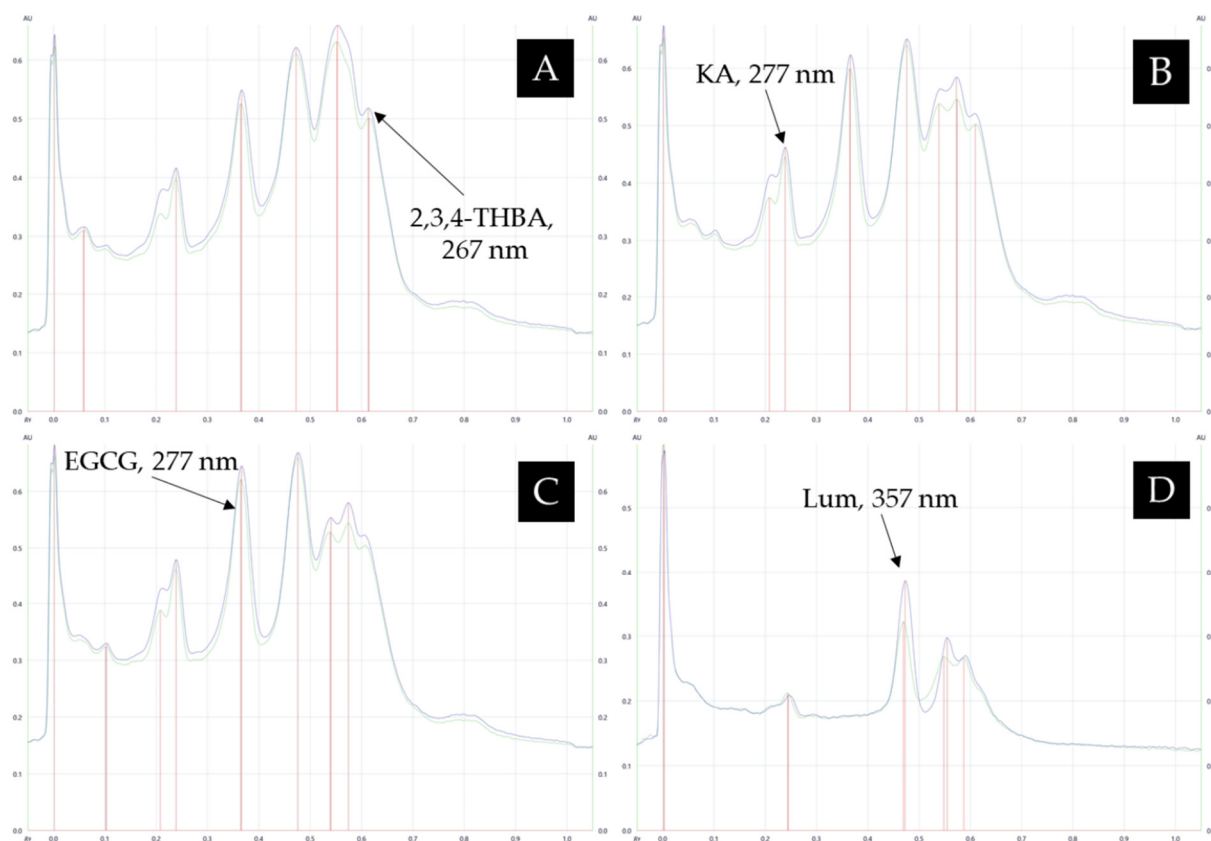

**Supplementary Figure S10 (A-D).** Profile Comparison of *Eucalyptus marginata* (Jarrah) Honey (green) and *Eucalyptus marginata* (Jarrah) Spiked with the Identified Compounds Based on Database 1A and 1B (blue) Scanned at the  $\lambda_{max}$  of Each Specific Compound Prior to Derivatisation

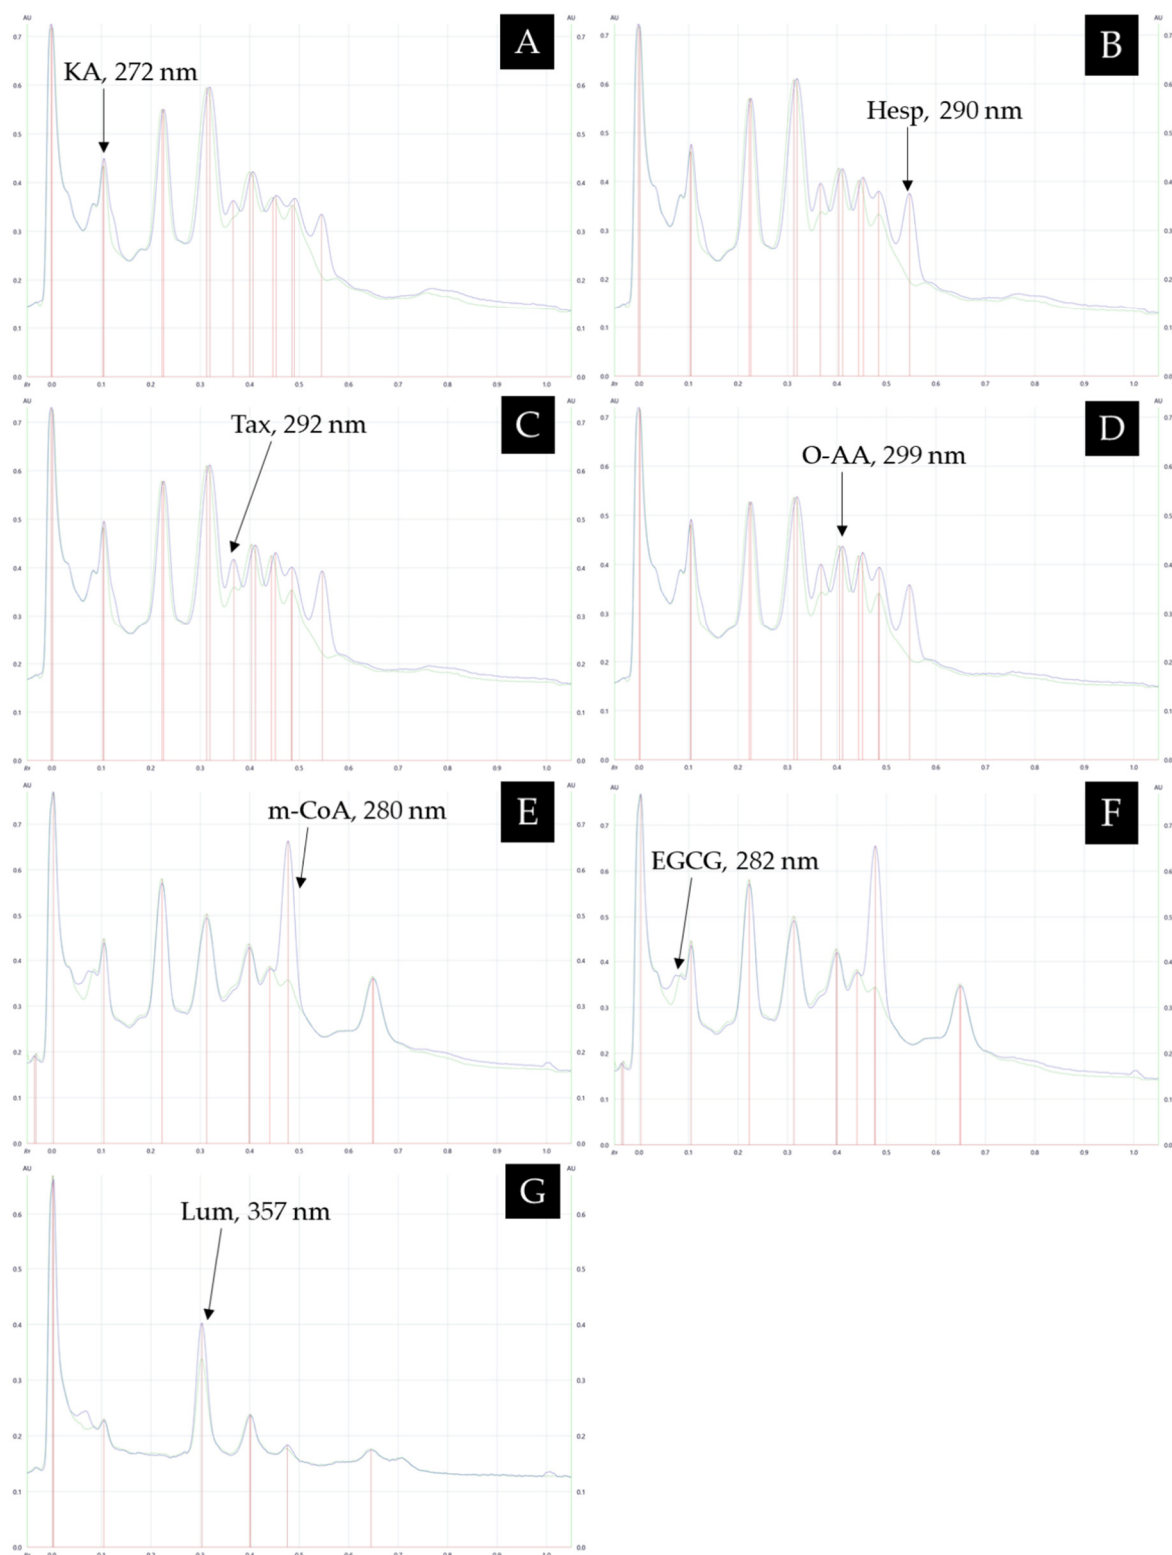

**Supplementary Figure S11 (A-G).** Profile Comparison of *Eucalyptus marginata* (Jarrah) Honey (green) and *Eucalyptus marginata* (Jarrah) Spiked with the Identified Compounds Based on Database 2A and 2B (blue) Scanned at the  $\lambda_{\text{max}}$  of Each Specific Compound Prior to Derivatisation



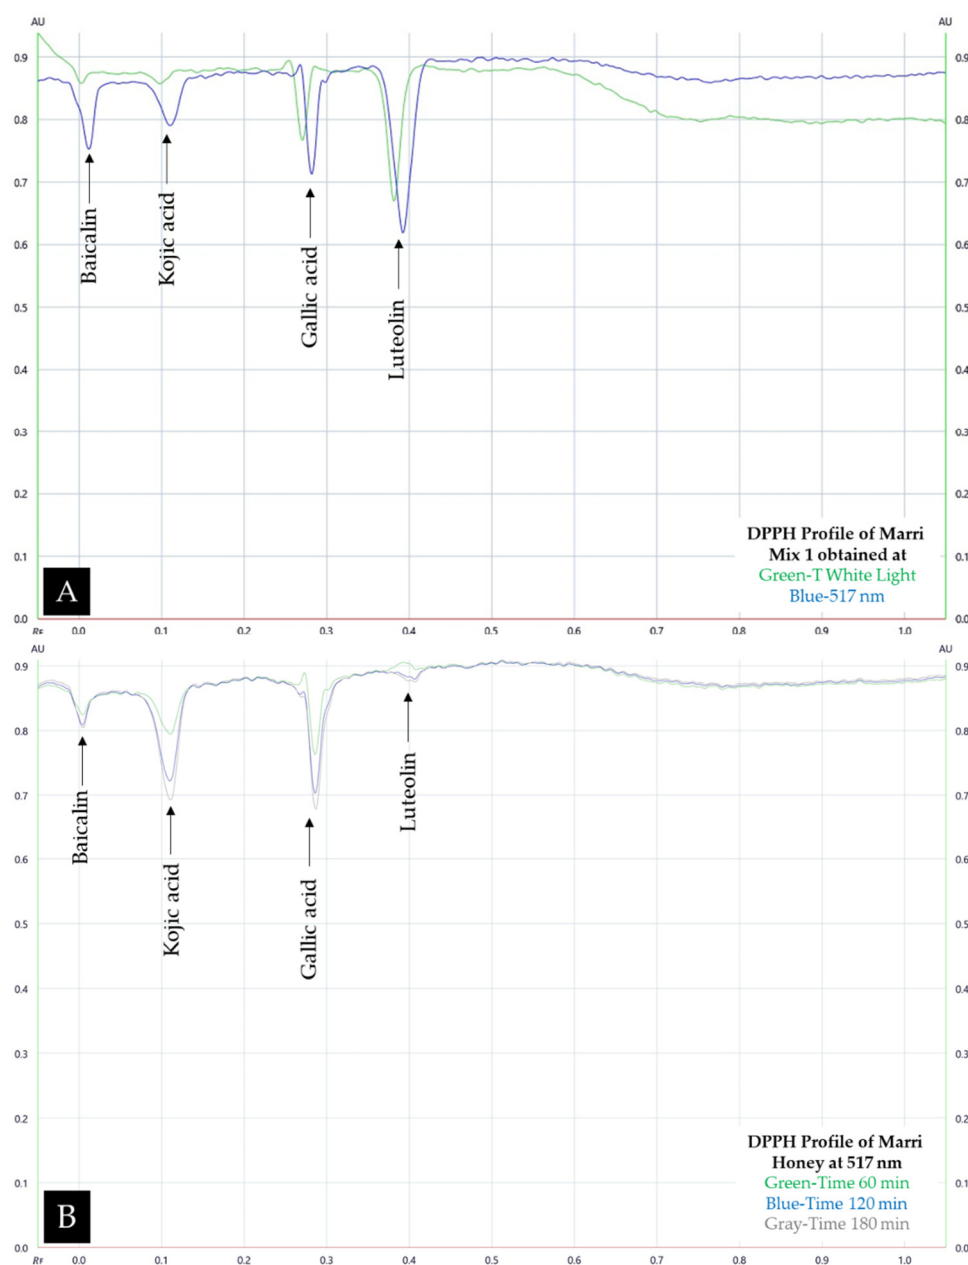

**Supplementary Figure S12 (A and B).** Comparison of the profiles of compounds identified in *Corymbia calophylla* (Marri) honey extract developed using mobile phase 1B after derivatisation with DPPH reagent after 1 h at transmittance in white light (green) vs scanned at 517 nm (**A**) and Comparison of the profiles of compounds identified in *Corymbia calophylla* (Marri) honey after derivatisation with DPPH reagent scanned at 517 nm and taken after 1 h (green), 2 h (blue), 3 h (gray) (**B**).

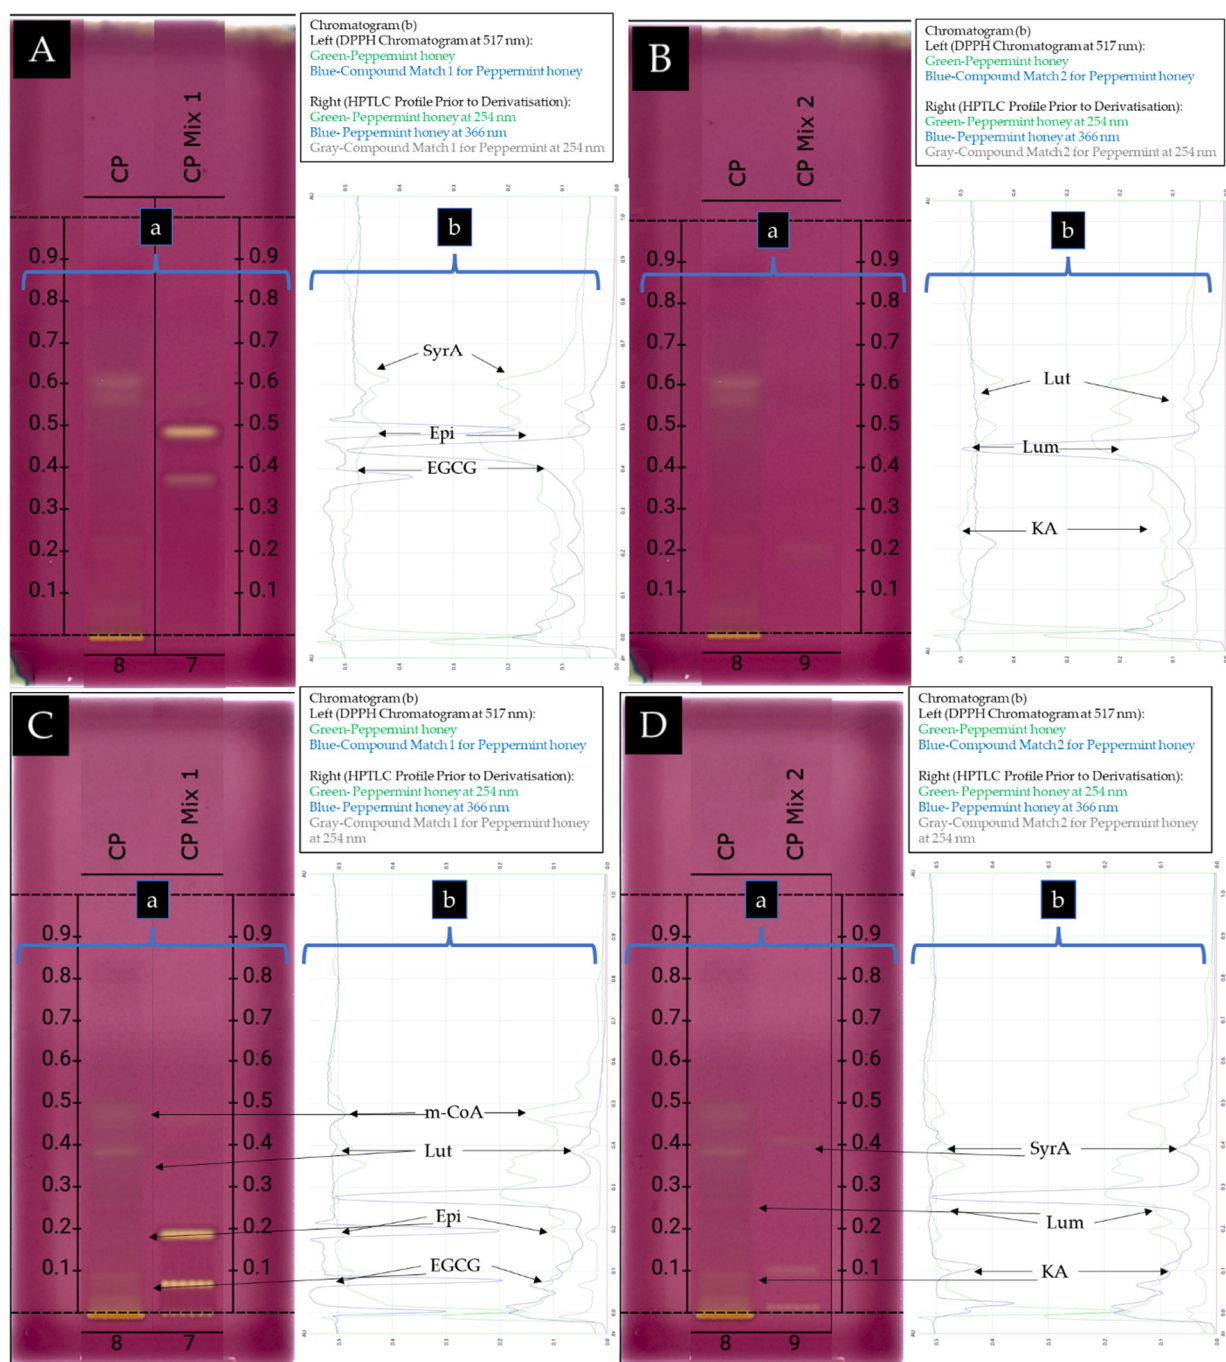

**Supplementary Figure S13 (A - D).** HPTLC Plate Image (a) of *Agonis flexuosa* (Coastal Peppermint) honey after derivatisation with DPPH reagent and developed using MPA (A and B) and developed using MPB (C and D) obtained at transmission in white light, and comparison of the profiles of *Agonis flexuosa* (Coastal Peppermint) honey (green) and *Agonis flexuosa* (Coastal Peppermint) honey spiked with the identified compounds (blue) after derivatisation with DPPH reagent obtained at 517 nm (b-left) and comparison of the profiles of *Agonis flexuosa* (Coastal Peppermint) honey obtained at 254 nm (green) and 366 nm (blue) prior to derivatisation and the profile of *Agonis flexuosa* (Coastal Peppermint) honey spiked with the identified compounds (gray) obtained at 277 nm prior to derivatisation (b right)

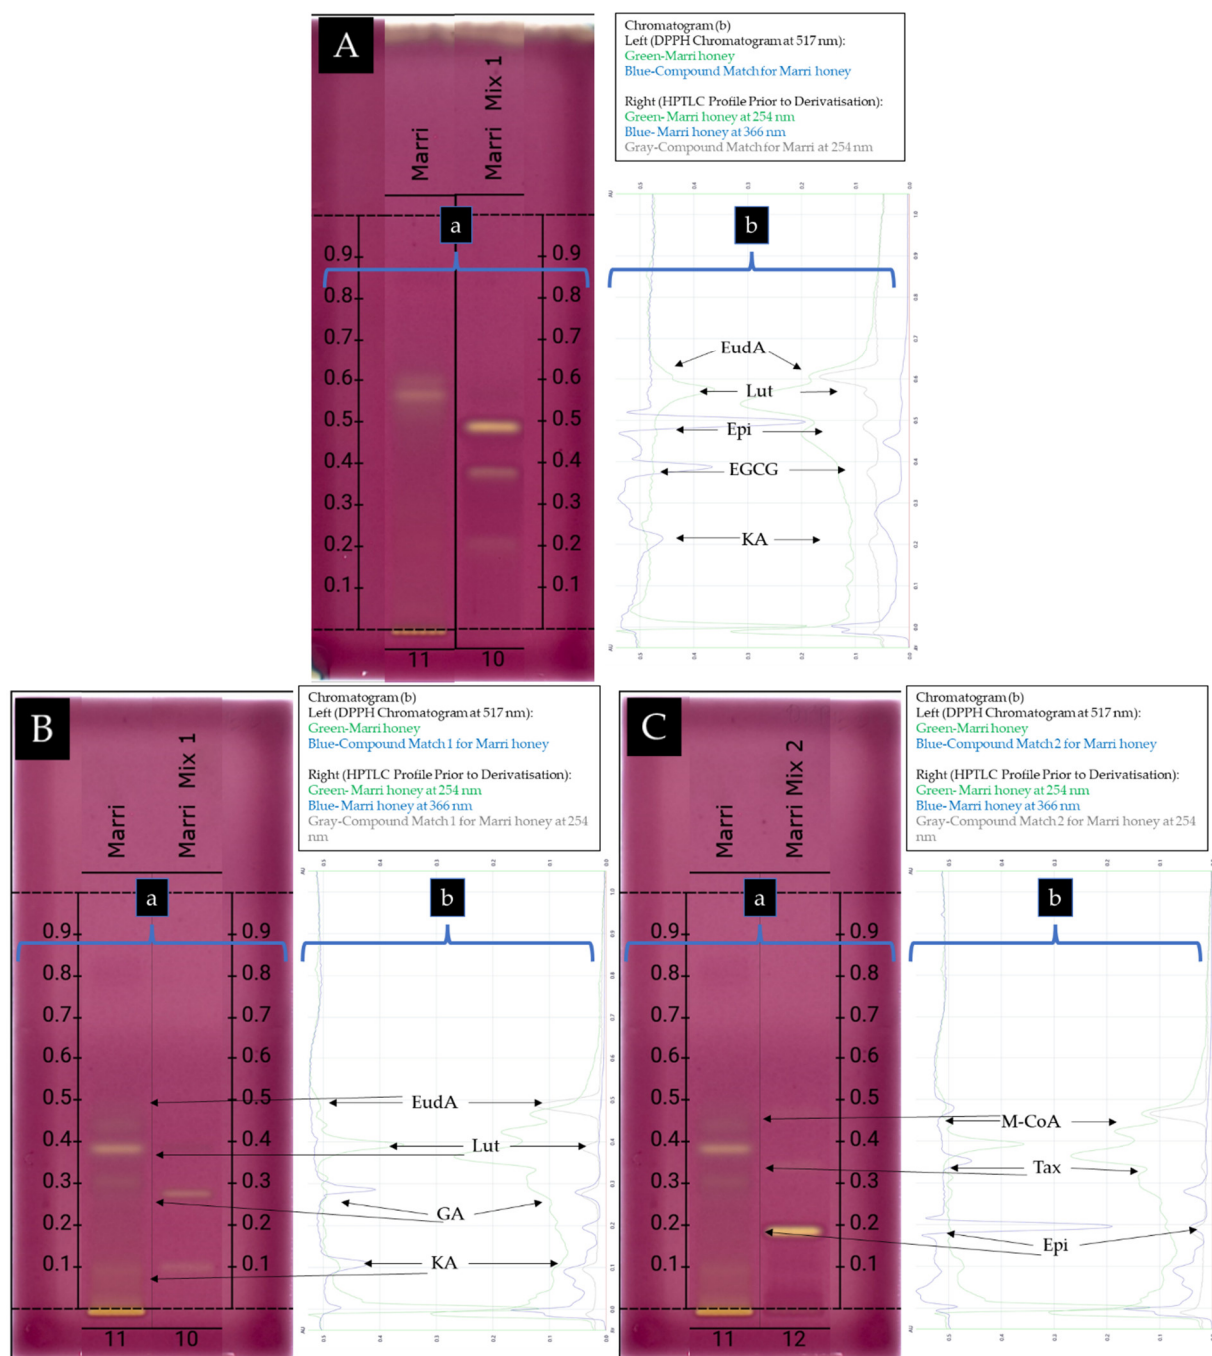

**Supplementary Figure S14. (A - C).** HPTLC Plate Image (a) of *Corymbia calophylla* (Marri) honey after derivatisation with DPPH reagent and developed using MPA (A) and developed using MPB (B and C) obtained at transmission in white light, and comparison of the profiles of *Corymbia calophylla* (Marri) honey (green) and *Corymbia calophylla* (Marri) honey spiked with the identified compounds (blue) after derivatisation with DPPH reagent obtained at 517 nm (b-left) and comparison of the profiles of *Corymbia calophylla* (Marri) honey obtained at 254 nm (green) and 366 nm (blue) prior to derivatisation and the profile of *Corymbia calophylla* (Marri) honey spiked with the identified compounds (gray) obtained at 277 nm prior to derivatisation (b right)



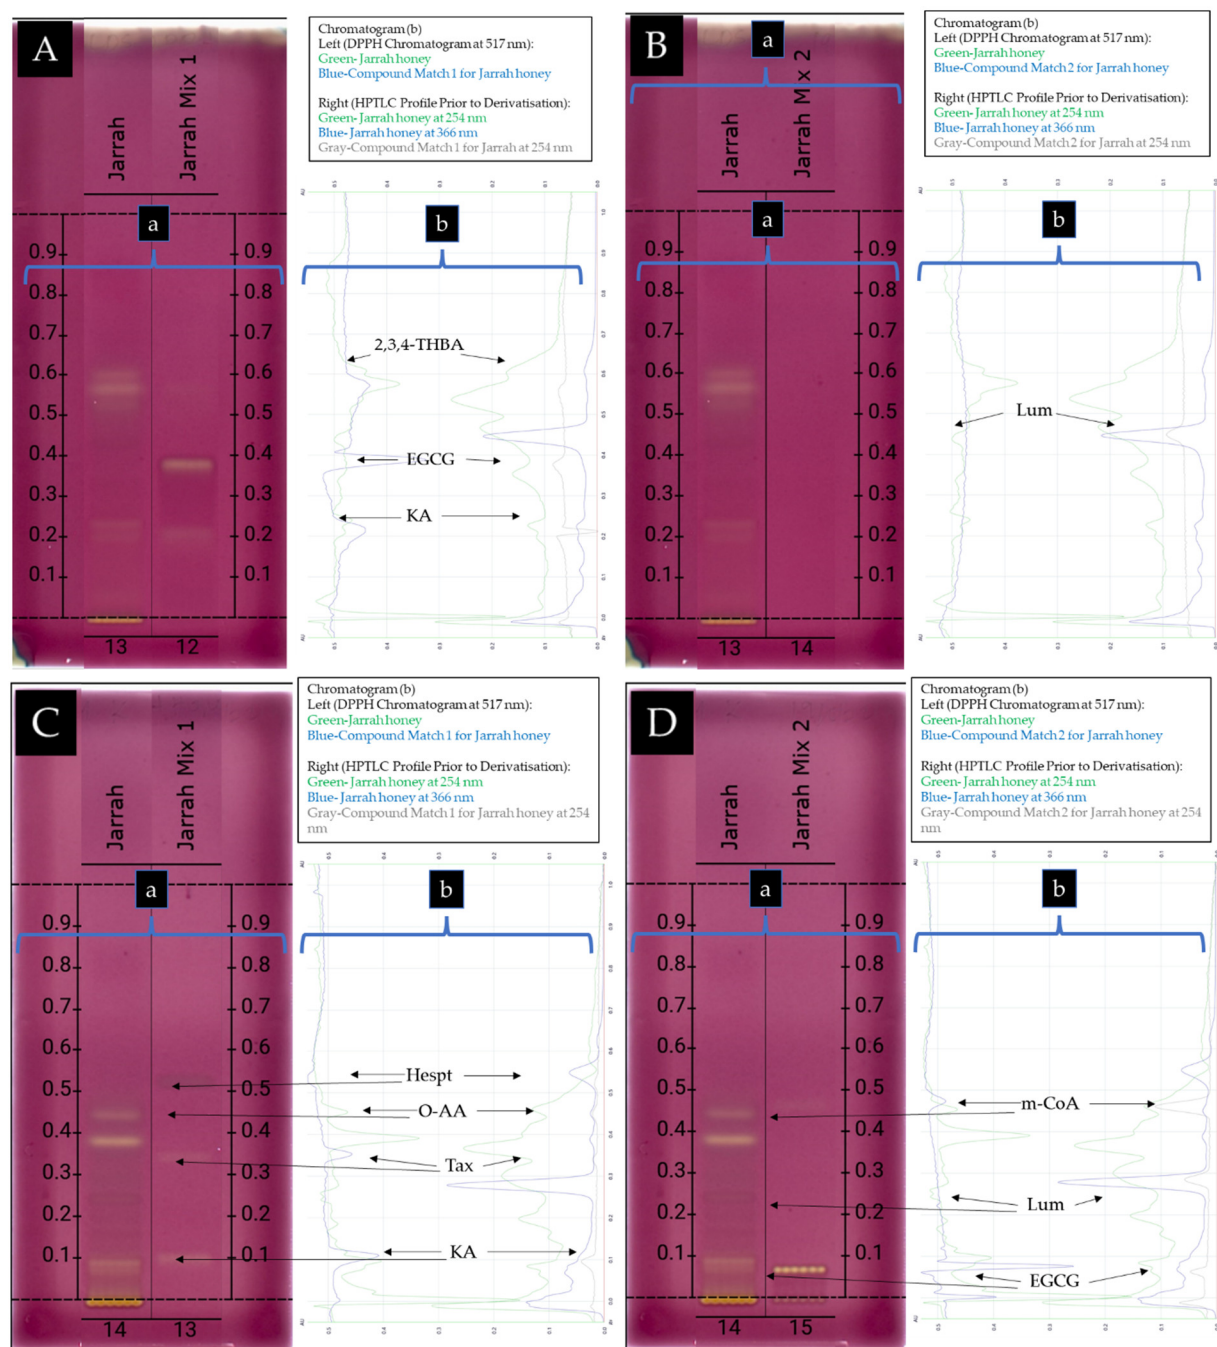

**Supplementary Figure S15. (A - D).** HPTLC Plate Image (a) of *Eucalyptus marginata* (Jarrah) honey after derivatisation with DPPH reagent and developed using MPA (A and B) and developed using MPB (C and D) obtained at transmission in white light, and comparison of the profiles of *Eucalyptus marginata* (Jarrah) honey (green) and Jarrah honey spiked with the identified compounds (blue) after derivatisation with DPPH reagent obtained at 517 nm (b-left) and comparison of the profiles of *Eucalyptus marginata* (Jarrah) honey obtained at 254 nm (green) and 366 nm (blue) prior to derivatisation and the profile of *Eucalyptus marginata* (Jarrah) honey spiked with the identified compounds (gray) obtained at 277 nm prior to derivatisation (b right)
